# Supplementary material for: Tablero de gestión de la explotación lechera de CLAS, algunos datos relevantes para el periodo 2007/2011
Source: Royal Society of Chemistry journal article supplement (doi:10.1039/c8ob02237b), 2012-01-01

*Supporting Information*

**Nickel-Catalyzed Regioselective Arylation of Aromatic amides with  
Aryl Iodides Enabled by *N,O*-Bidendate Directing Group**

Pinhua Li,<sup>a,b</sup> Guan-Wu Wang,<sup>\*a</sup> Hao Chen<sup>b</sup> and Lei Wang<sup>\*b</sup>

<sup>a</sup>Department of Chemistry, University of Science and Technology of China, Hefei,  
Anhui 230026, P. R. China, E-mail: [gwang@ustc.edu.cn](mailto:gwang@ustc.edu.cn)

<sup>b</sup>Department of Chemistry, Huaibei Normal University, Huaibei, Anhui 235000, P. R.  
China, E-mail: [leiwang@chnu.edu.cn](mailto:leiwang@chnu.edu.cn)

*Table of Contents for Supporting Information*

|                                                         |   |
|---------------------------------------------------------|---|
| 1. Experimental Section                                 |   |
| Preparation of the aromatic amides .....                | 2 |
| Optimization of reaction conditions .....               | 3 |
| 2. <sup>1</sup> H and <sup>13</sup> C NMR spectra ..... | 5 |

## 1. Experimental Section

All of 2-aminopyridine 1-oxide was synthesized according to the known method [R. Adams, S. Miyano, *J. Am. Chem. Soc.* **1954**, *76*, 2785]. The aromatic amides were synthesized from the corresponding aromatic acids and 2-aminopyridine 1-oxide (see the following experimental procedure for detail).

### 1.1 General Procedure for the Preparation of Amide Substrates

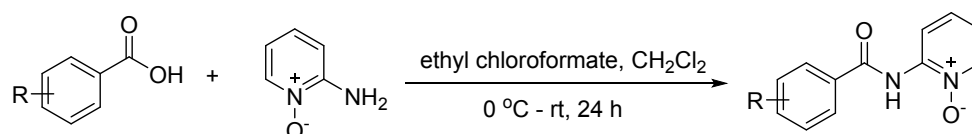

To a 100 mL reaction flask in ice-water bath were added CH<sub>2</sub>Cl<sub>2</sub> (30 mL), aromatic acid (17.5 mmol), NEt<sub>3</sub> (3.14 g, 35.0 mmol), Ethyl chloroformate (1.90 g, 17.5 mmol), 2-aminopyridine 1-oxide (1.00 g, 10.0 mmol). The reaction mixture was gradually warmed to room temperature, and stirred for 24 hours. The reaction was quenched with water (50 mL) and extracted with CH<sub>2</sub>Cl<sub>2</sub> (3 × 20 mL). The mixture was dried by MgSO<sub>4</sub> and filtered and concentrated under reduced pressure to yield a crude product, which was purified by flash chromatography (silica gel, ethyl acetate / ethanol = 6:1 to 1:1), affording the desired product as a white to yellow solid.

## 1.2 Optimization of reaction conditions

### 1.2.1 Optimization of the base on the model reaction<sup>a</sup>

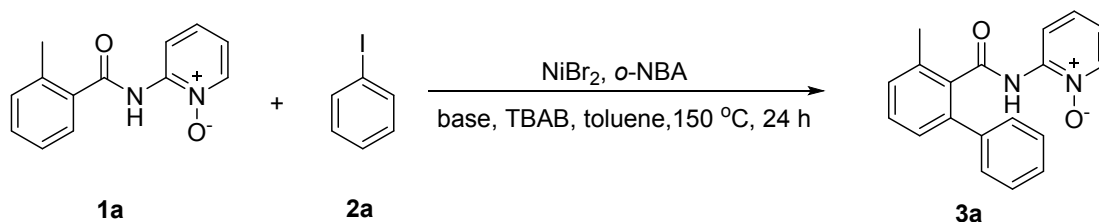

| entry | base                      | yield [%] <sup>b</sup> |
|-------|---------------------------|------------------------|
| 1     | $\text{Na}_2\text{CO}_3$  | 71                     |
| 2     | $\text{K}_2\text{CO}_3$   | 45                     |
| 3     | $\text{Cs}_2\text{CO}_3$  | 60                     |
| 4     | $\text{KHCO}_3$           | 43                     |
| 5     | $\text{NaHCO}_3$          | 40                     |
| 6     | $\text{CH}_3\text{COONa}$ | 45                     |
| 7     | $\text{K}_3\text{PO}_4$   | 35                     |
| 8     | $t\text{BuOLi}$           | n.r.                   |
| 9     | KF                        | n.r.                   |
| 10    | pyridine                  | n.r.                   |

<sup>a</sup>Conditions: **1a** (0.2 mmol), **2a** (0.6 mmol),  $\text{NiBr}_2$  (0.04 mmol, 20 mol%), *o*-NBA (0.08 mmol, 40 mol%), base (0.4 mmol, 2.0 equiv), TBAB (0.8 mmol, 4.0 equiv), toluene (1.5 mL), 150 °C,  $\text{N}_2$  atmosphere, 24 h. <sup>b</sup>Isolated yields. *o*-NBA = *o*-nitrobenzoic acid. n.r. = no reaction.

### 1.2.2 Optimization of the solvent on the model reaction<sup>a</sup>

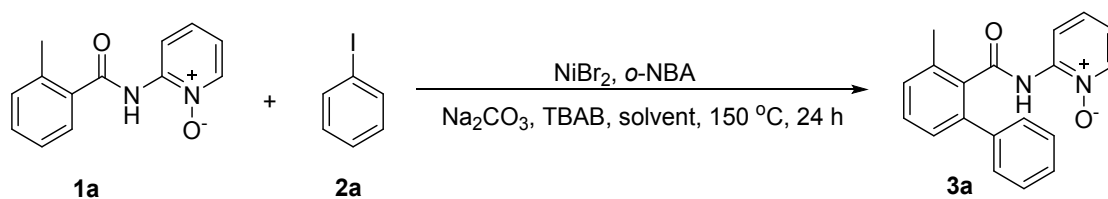

| entry | solvent                           | yield [%] <sup>b</sup> |
|-------|-----------------------------------|------------------------|
| 1     | toluene                           | 71                     |
| 2     | dioxane                           | 59                     |
| 3     | THF                               | 44                     |
| 4     | $\text{CH}_3\text{CH}_2\text{OH}$ | 36                     |
| 5     | $\text{PhCF}_3$                   | 55                     |
| 6     | DCE                               | 40                     |
| 7     | DMF                               | 42                     |
| 8     | DMA                               | 37                     |
| 9     | DMSO                              | 34                     |
| 10    | NMP                               | trace                  |

<sup>a</sup>Conditions: **1a** (0.2 mmol), **2a** (0.6 mmol),  $\text{NiBr}_2$  (0.04 mmol, 20 mol%), *o*-NBA (0.08 mmol, 40 mol%),  $\text{Na}_2\text{CO}_3$  (0.4 mmol, 2.0 equiv), TBAB (0.8 mmol, 4.0 equiv), solvent (1.5 mL), 150 °C,  $\text{N}_2$  atmosphere, 24 h. <sup>b</sup>Isolated yields. *o*-NBA = *o*-nitrobenzoic acid. DCE = 1,2-dichloroethane. DMA = Dimethylacetamide. NMP = 1-Methyl-2-pyrrolidinone.

## 2. <sup>1</sup>H and <sup>13</sup>C NMR spectra

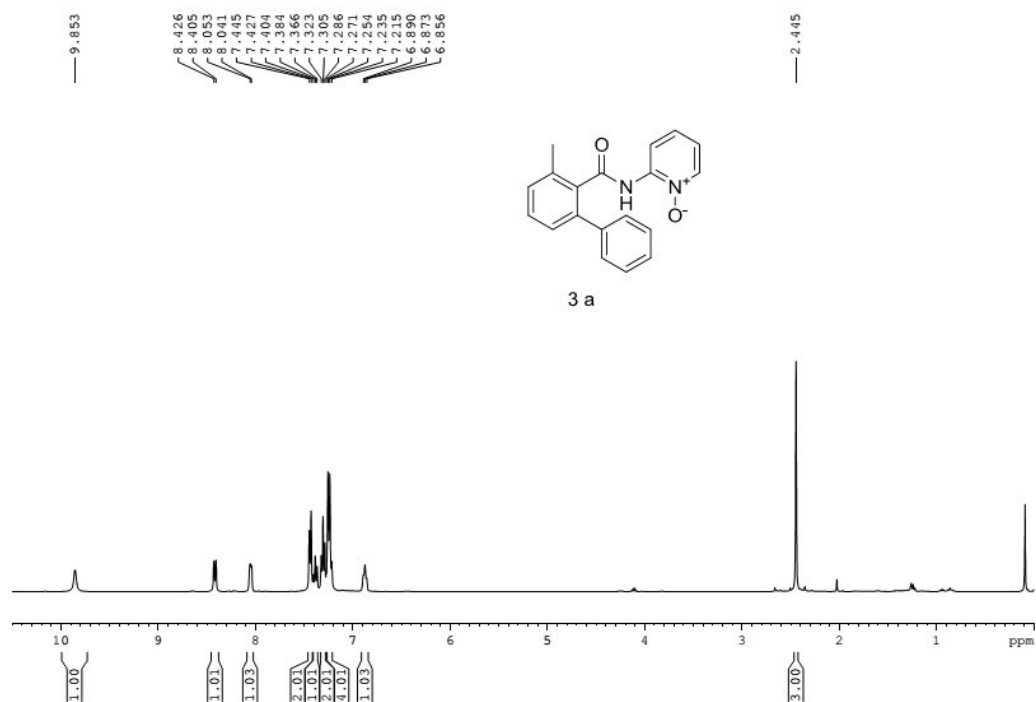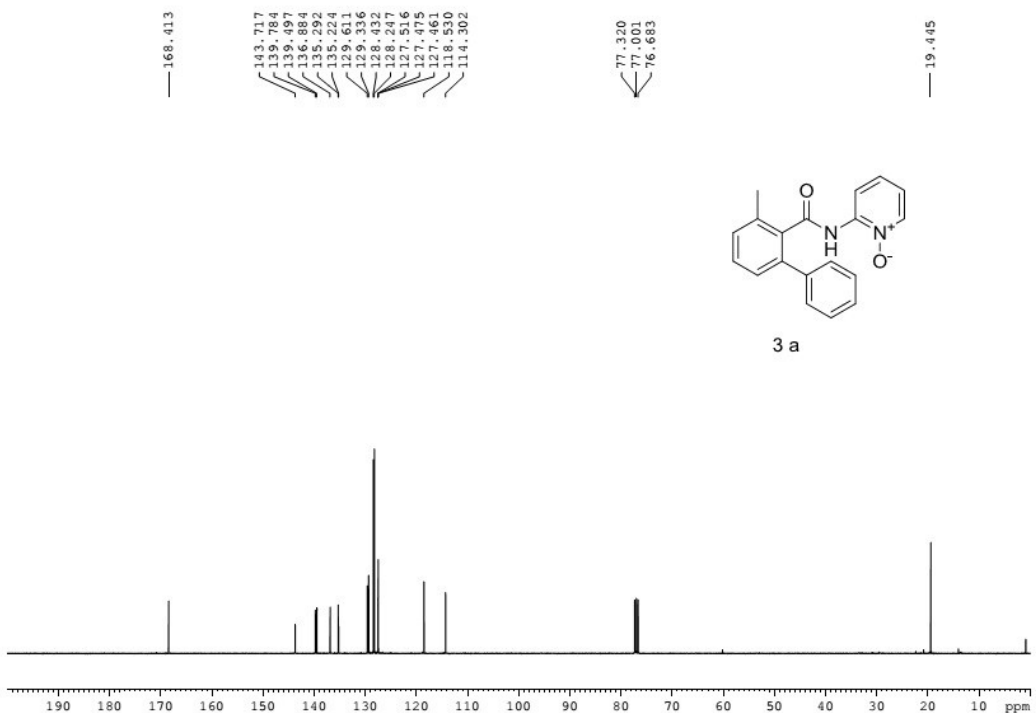

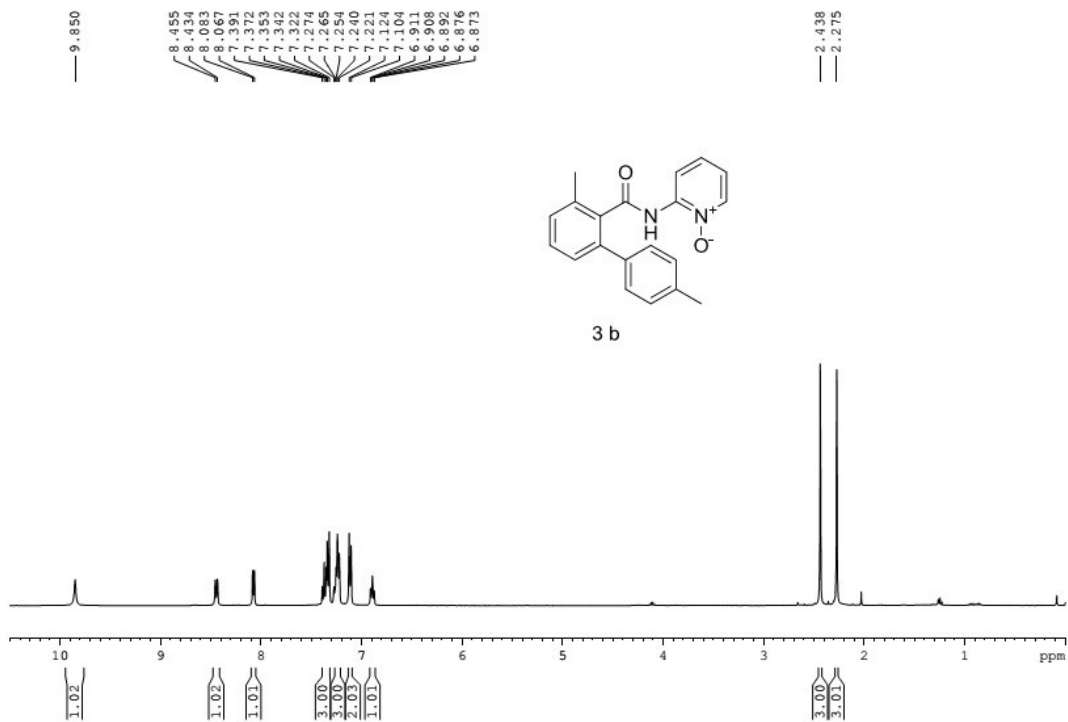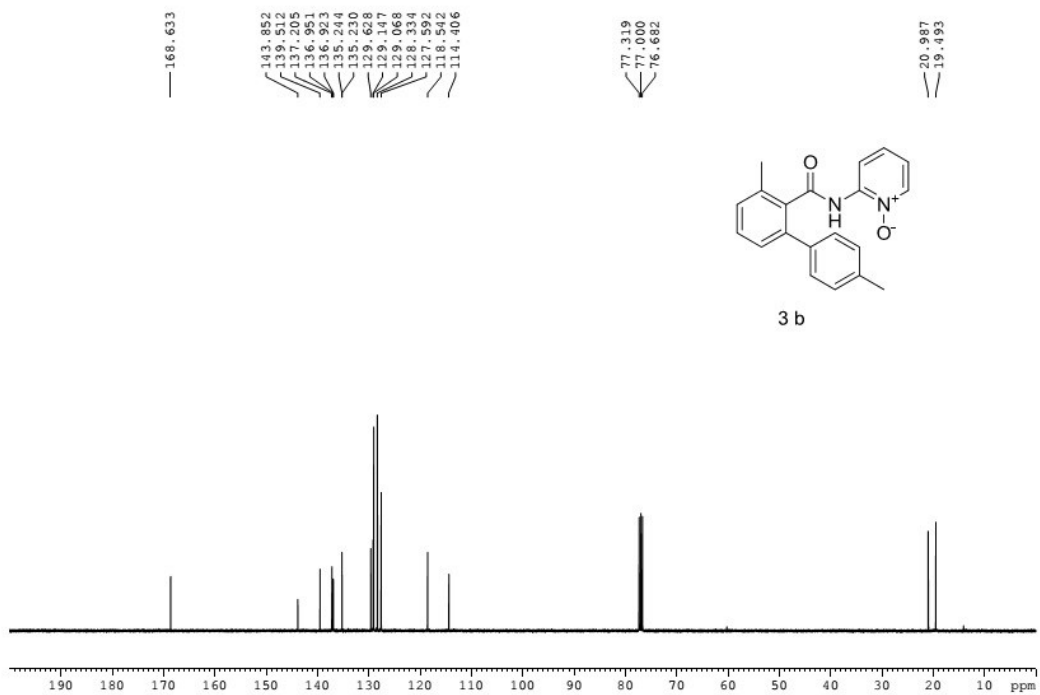

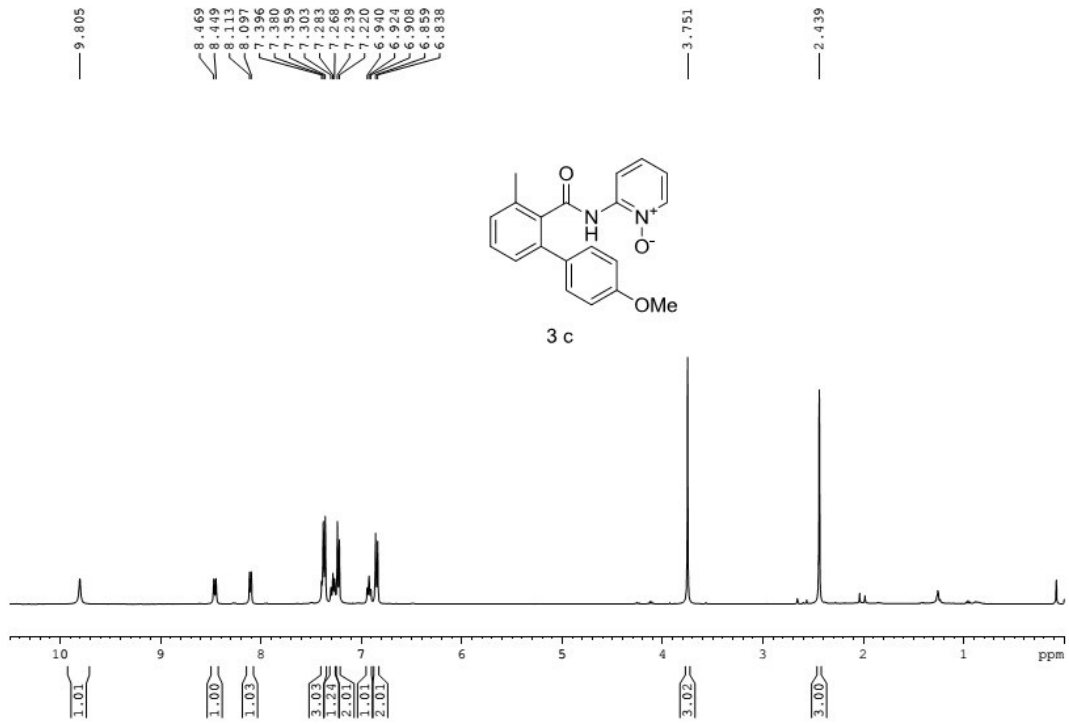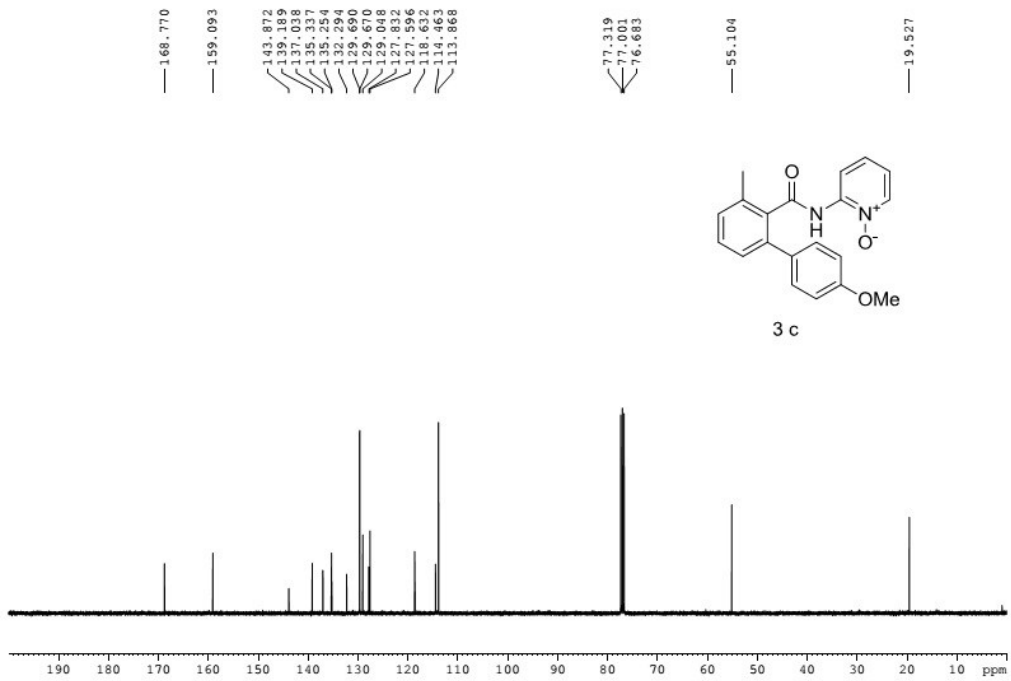

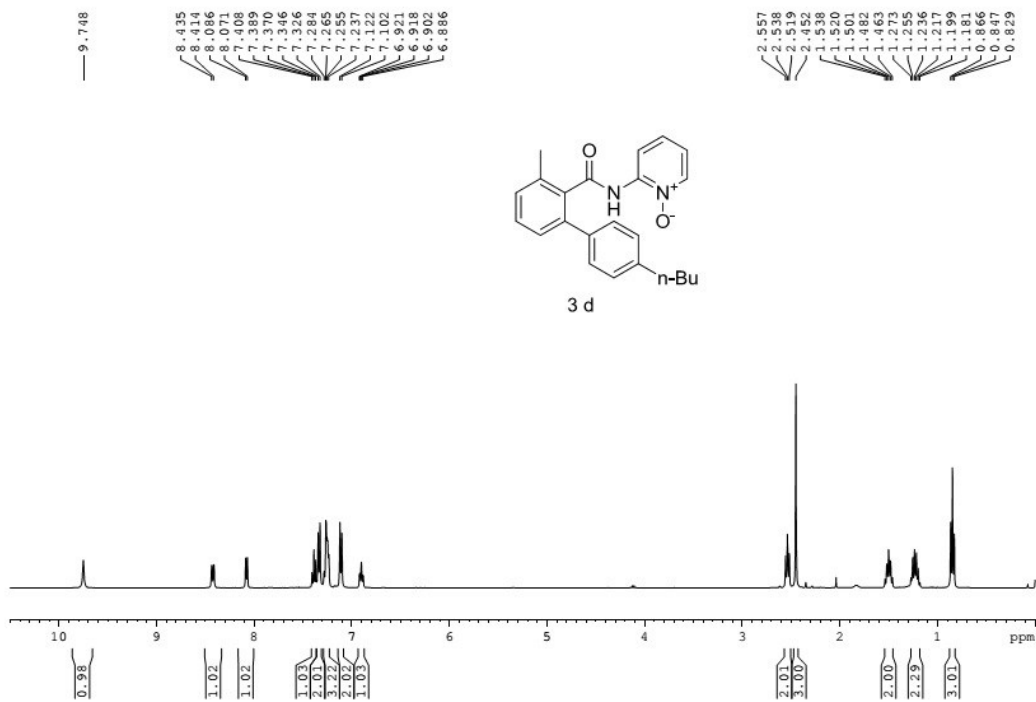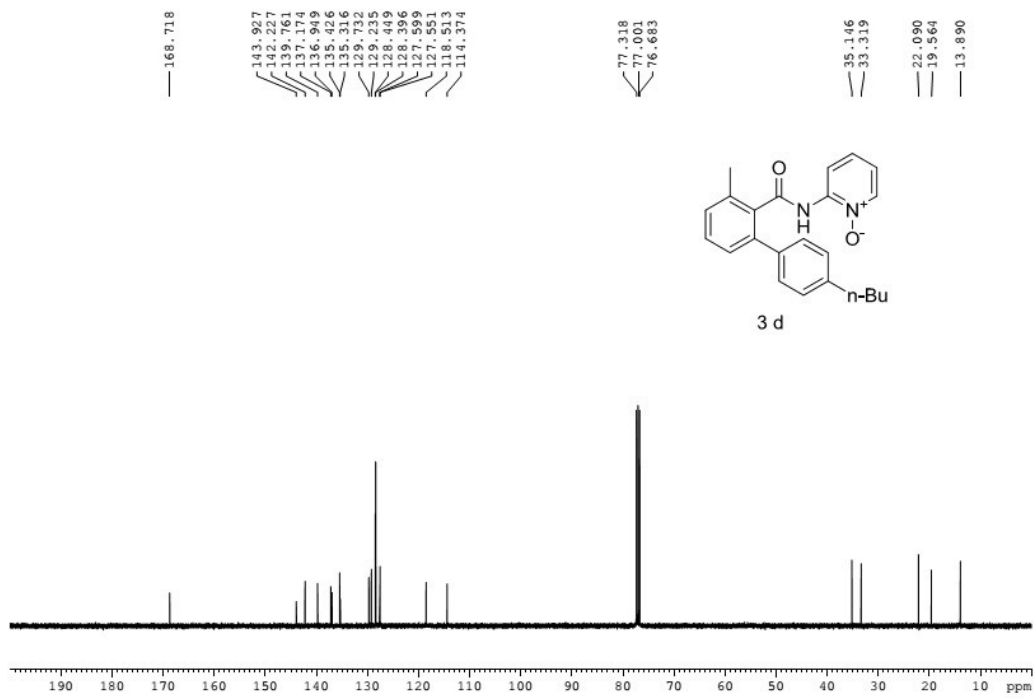



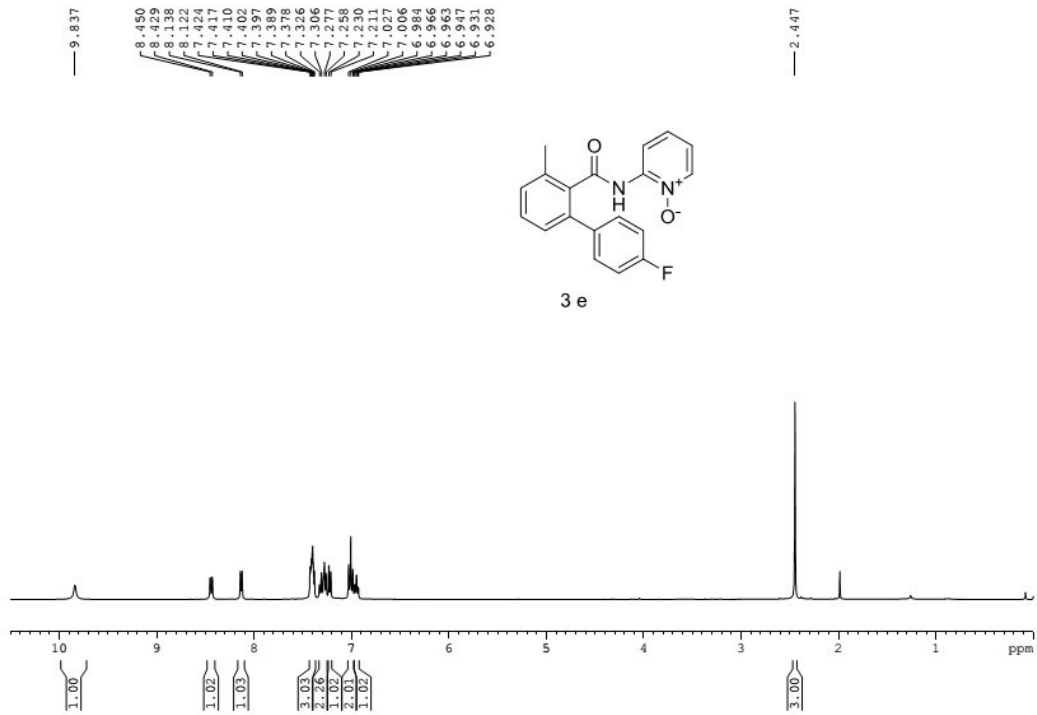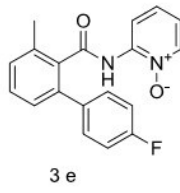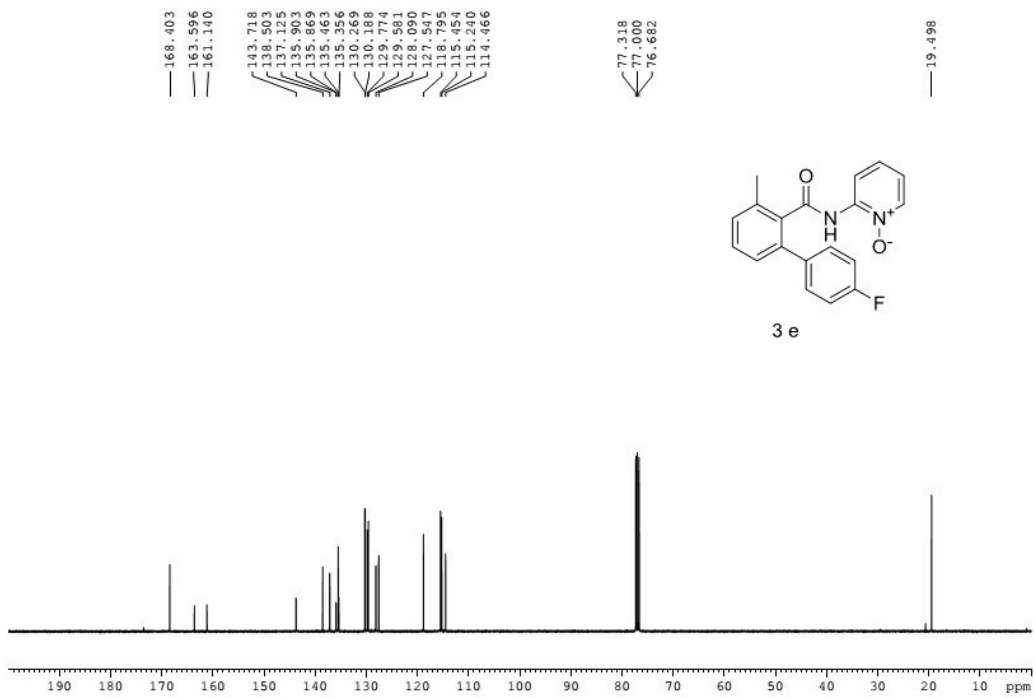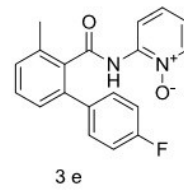

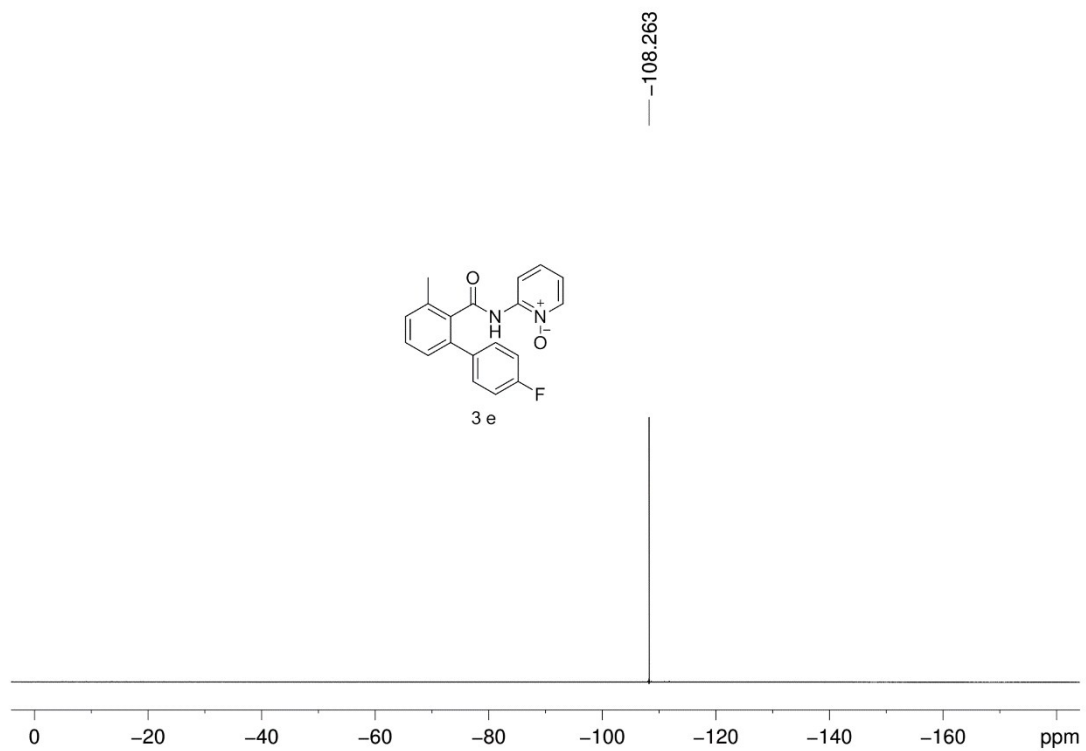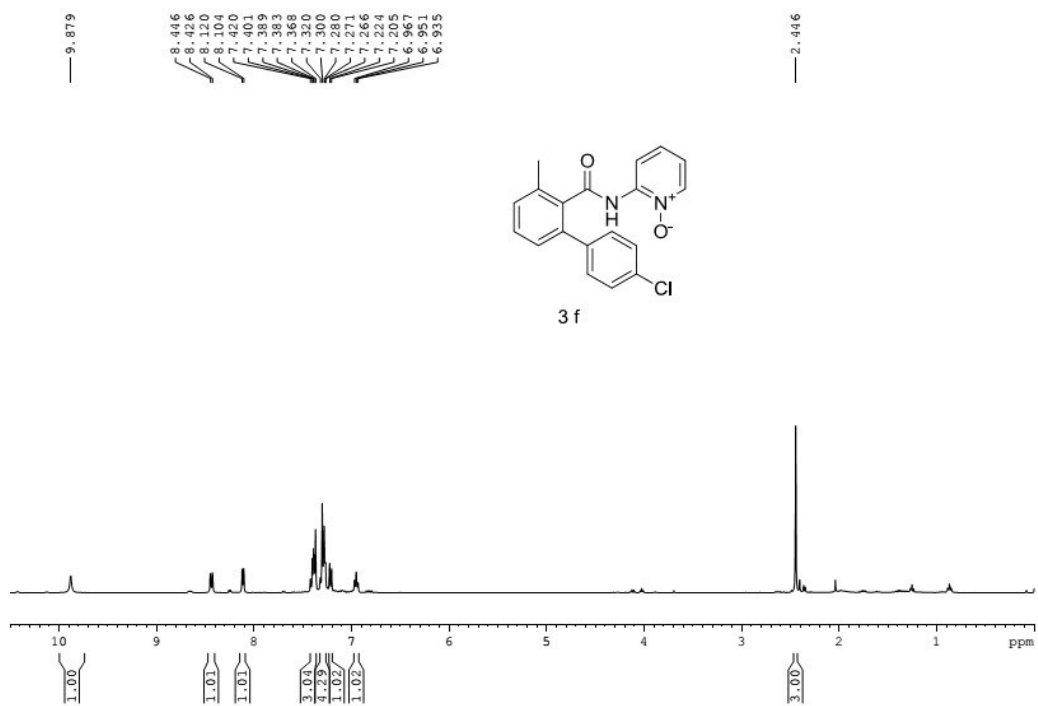

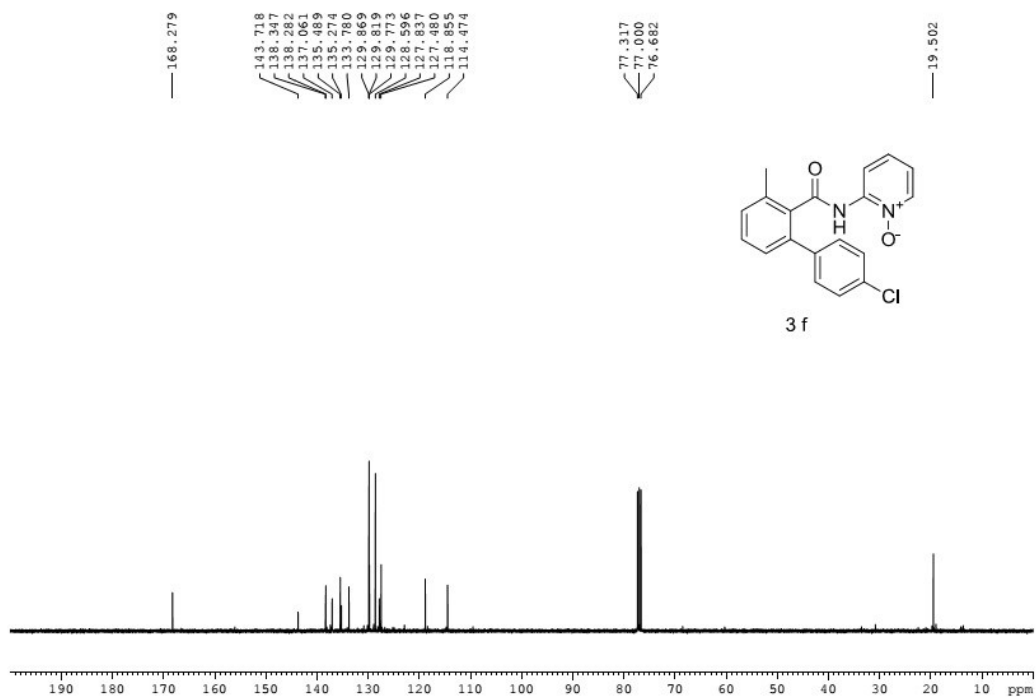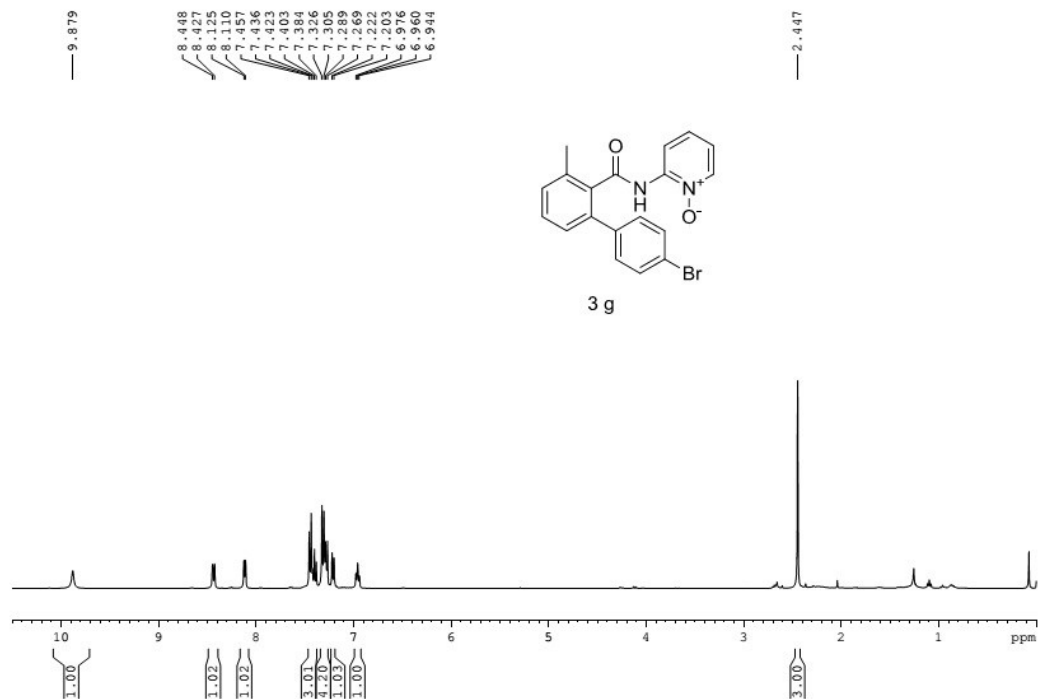

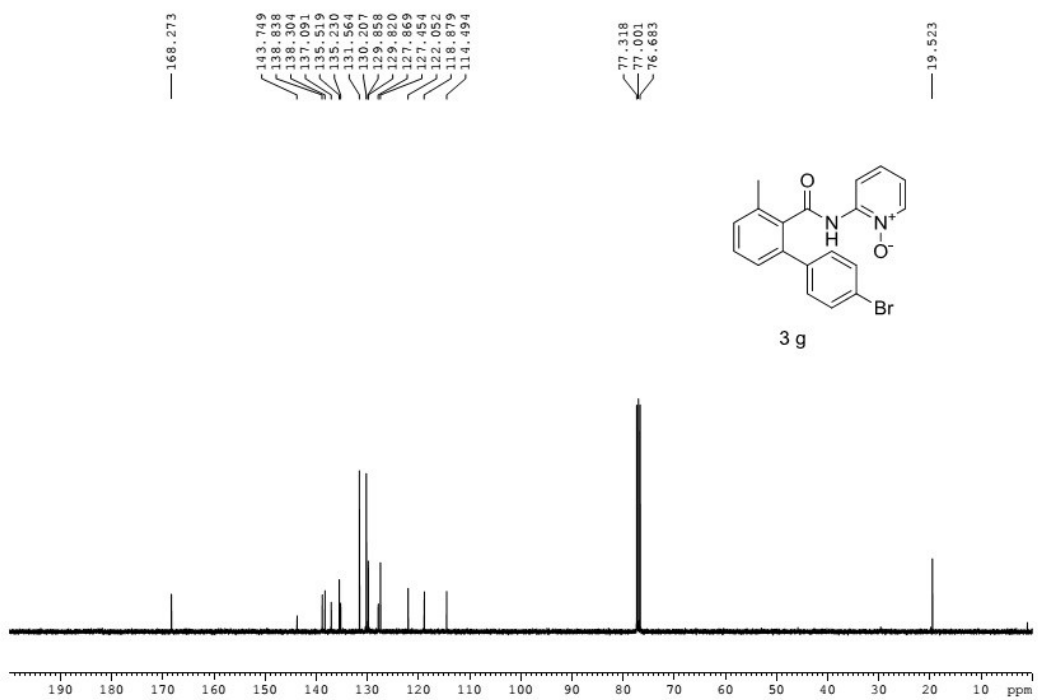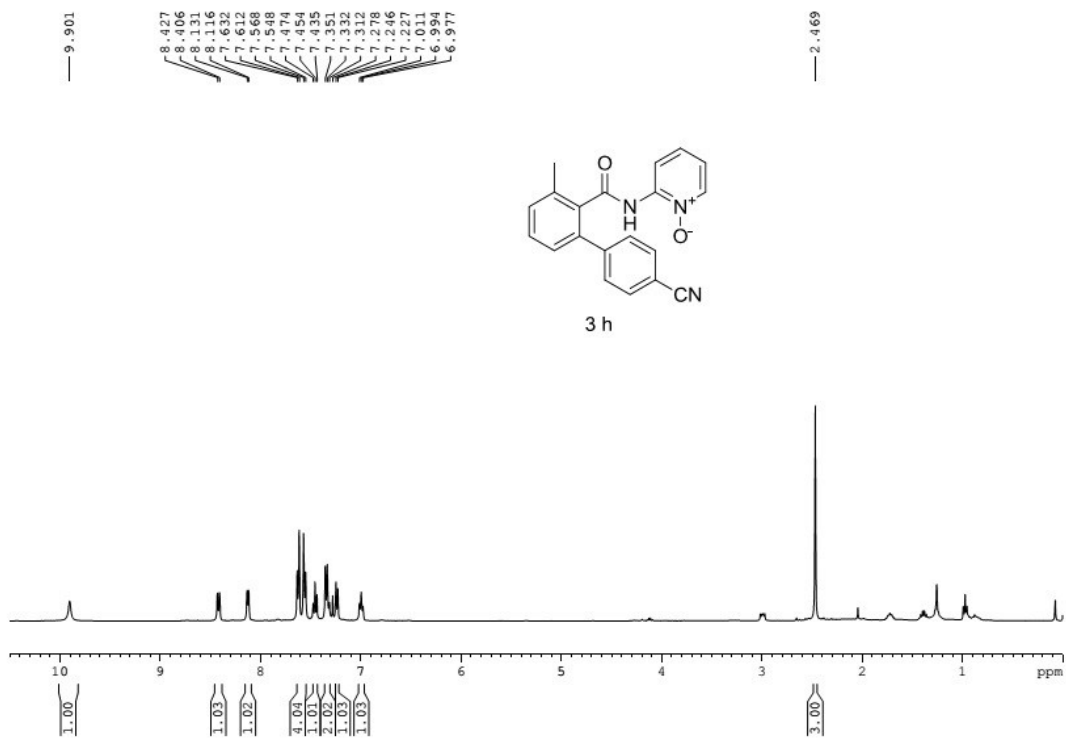

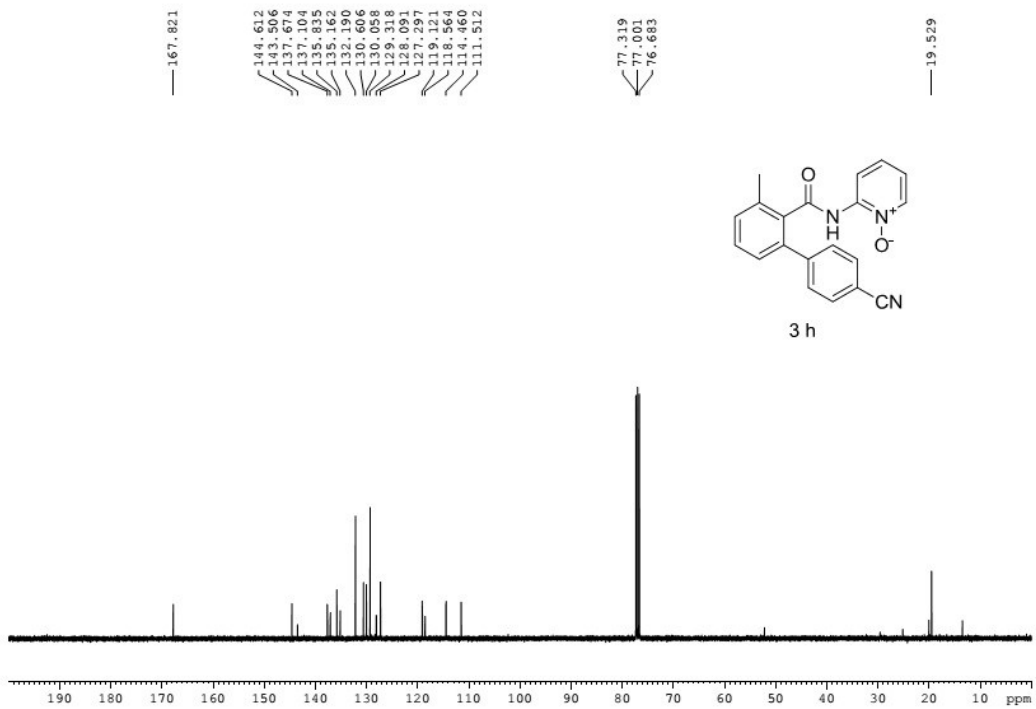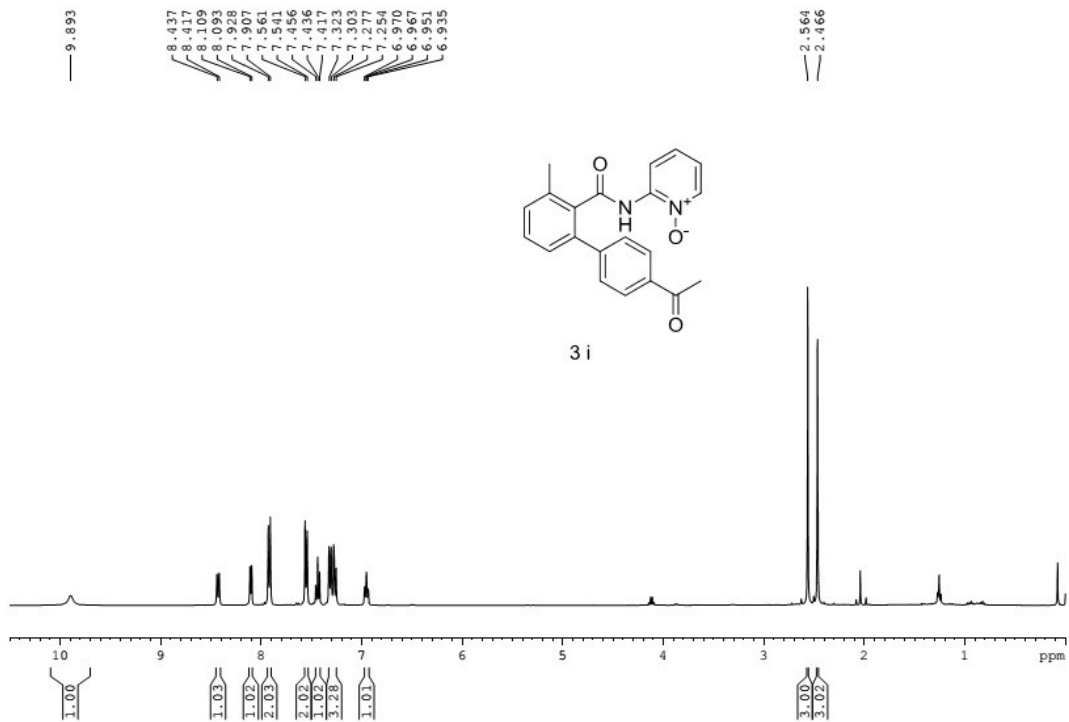

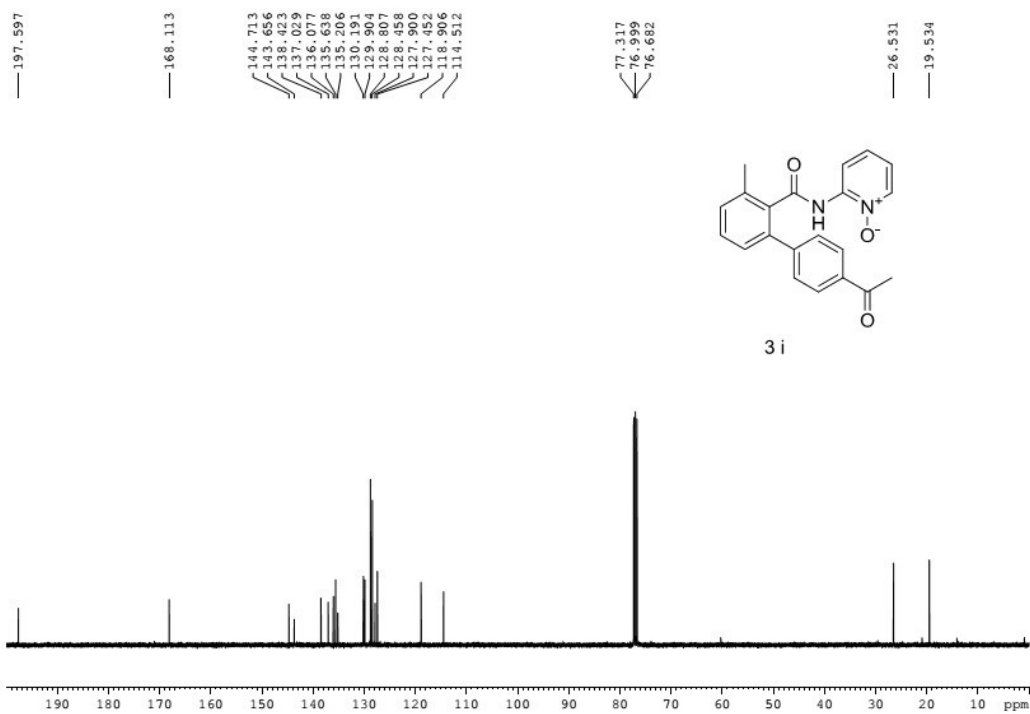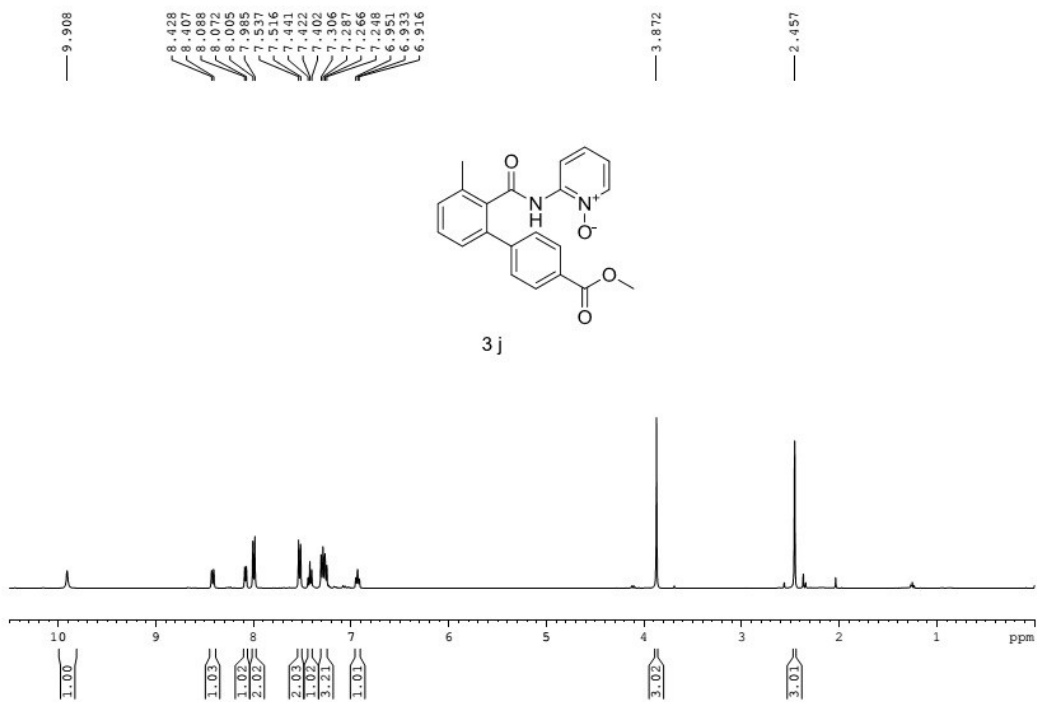

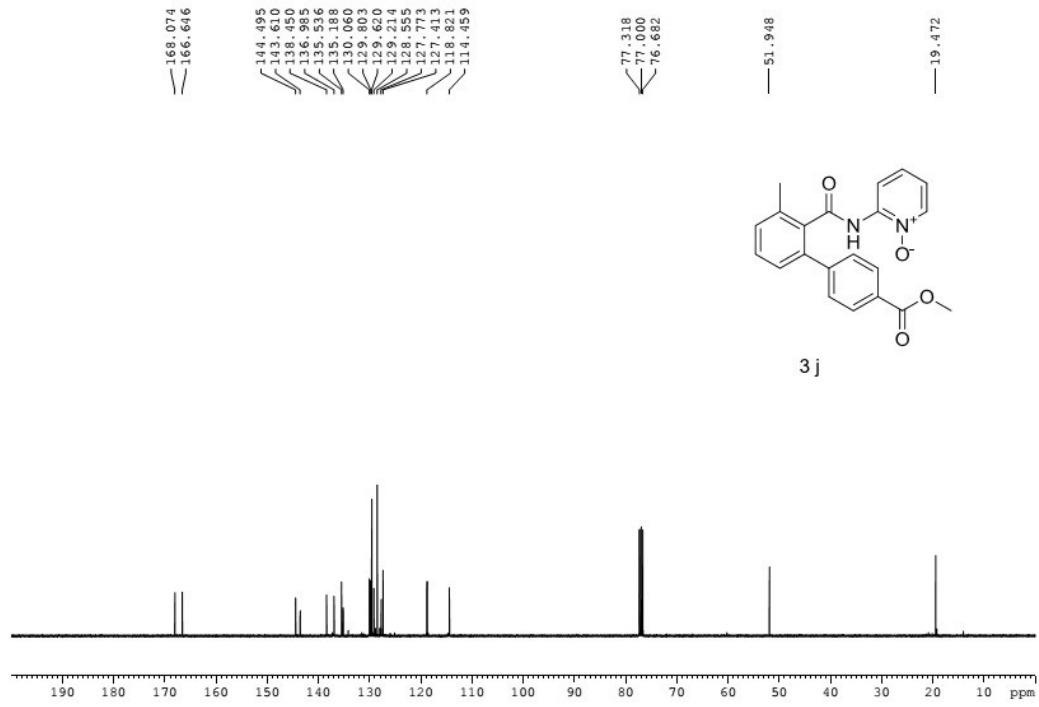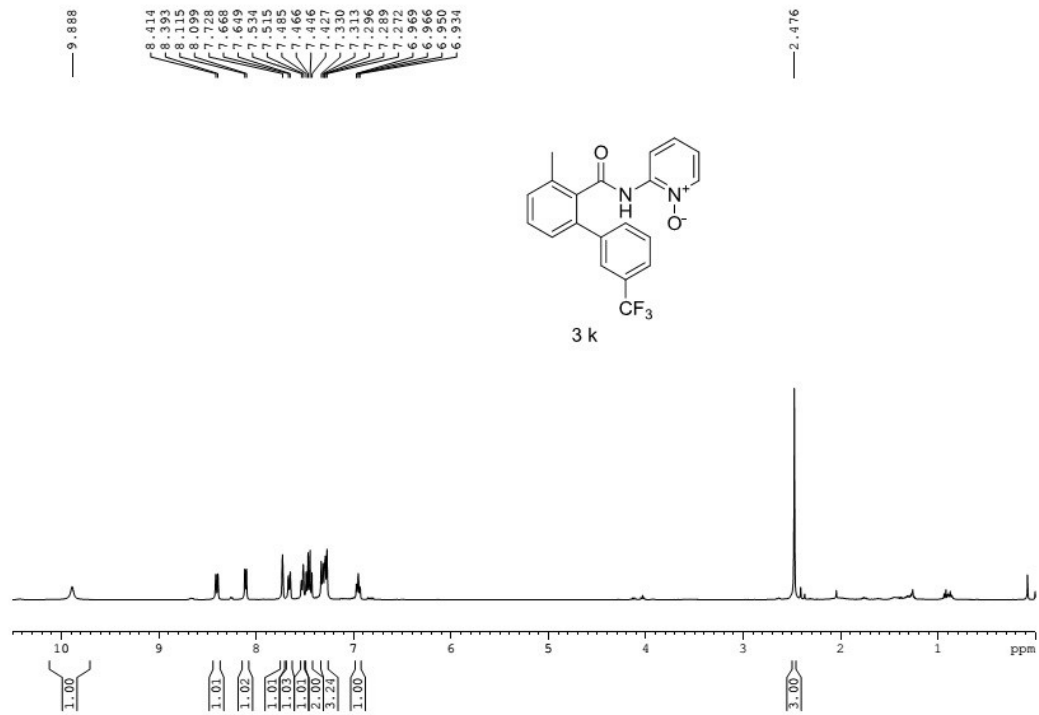

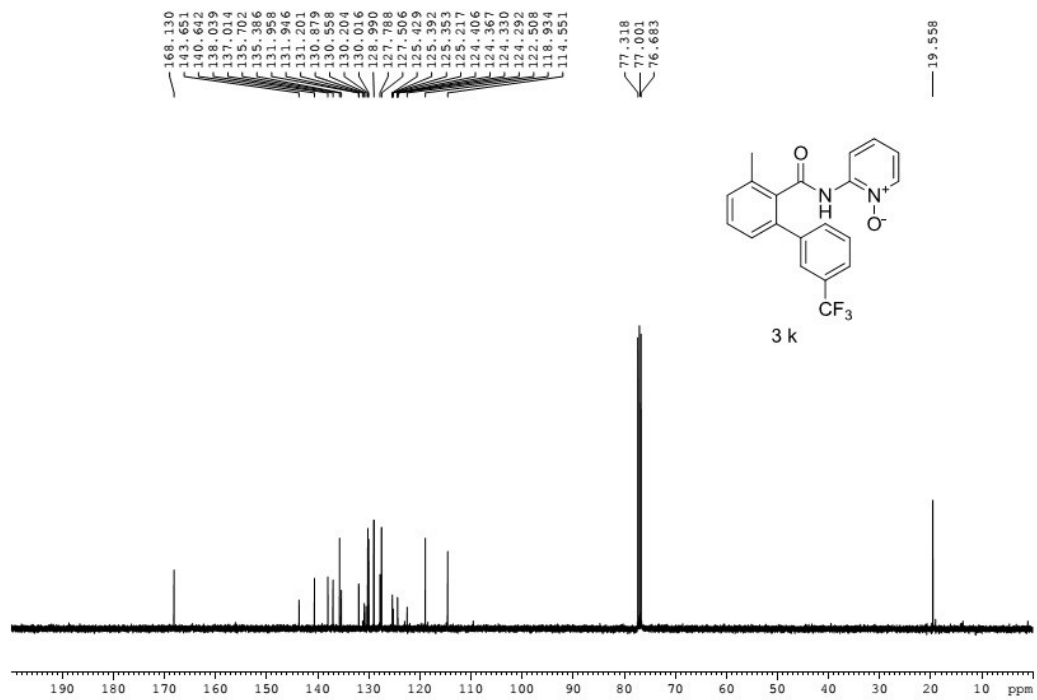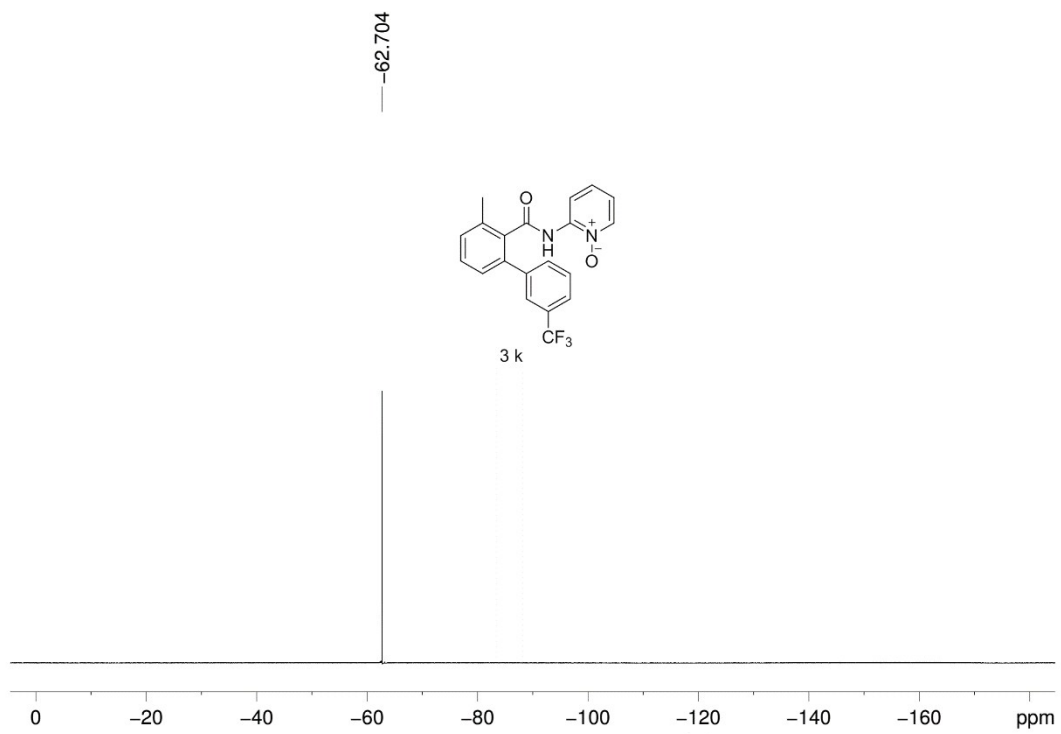



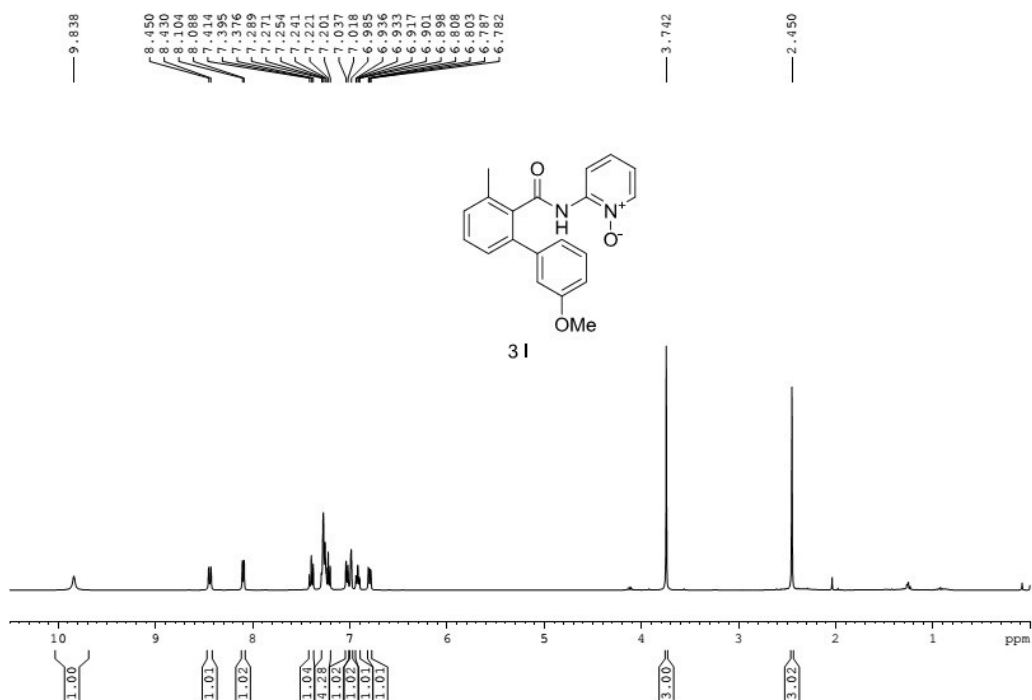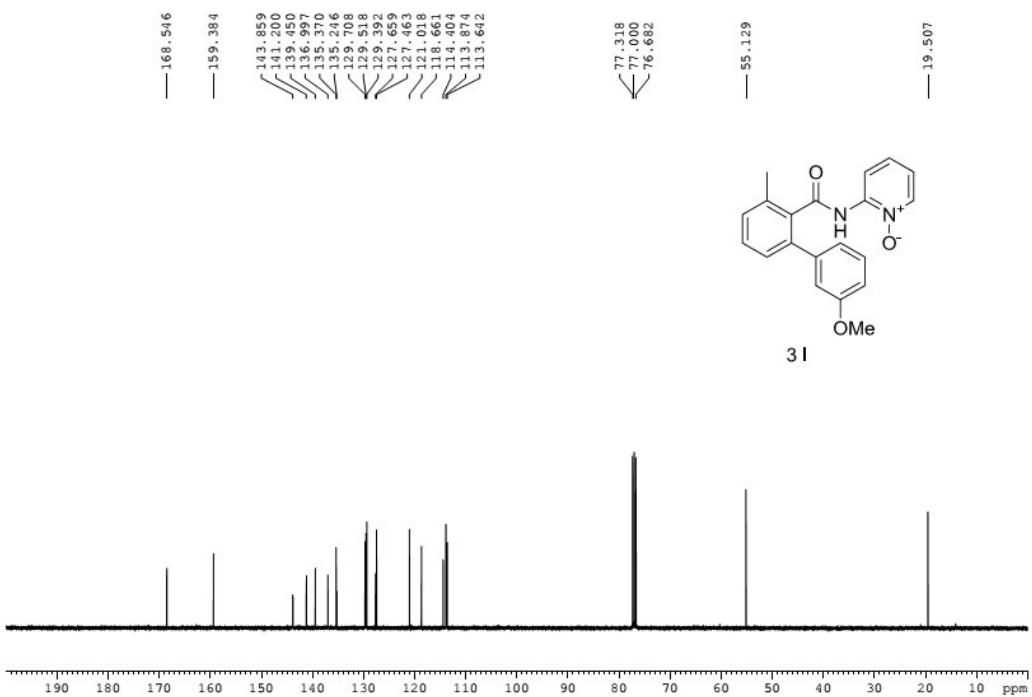

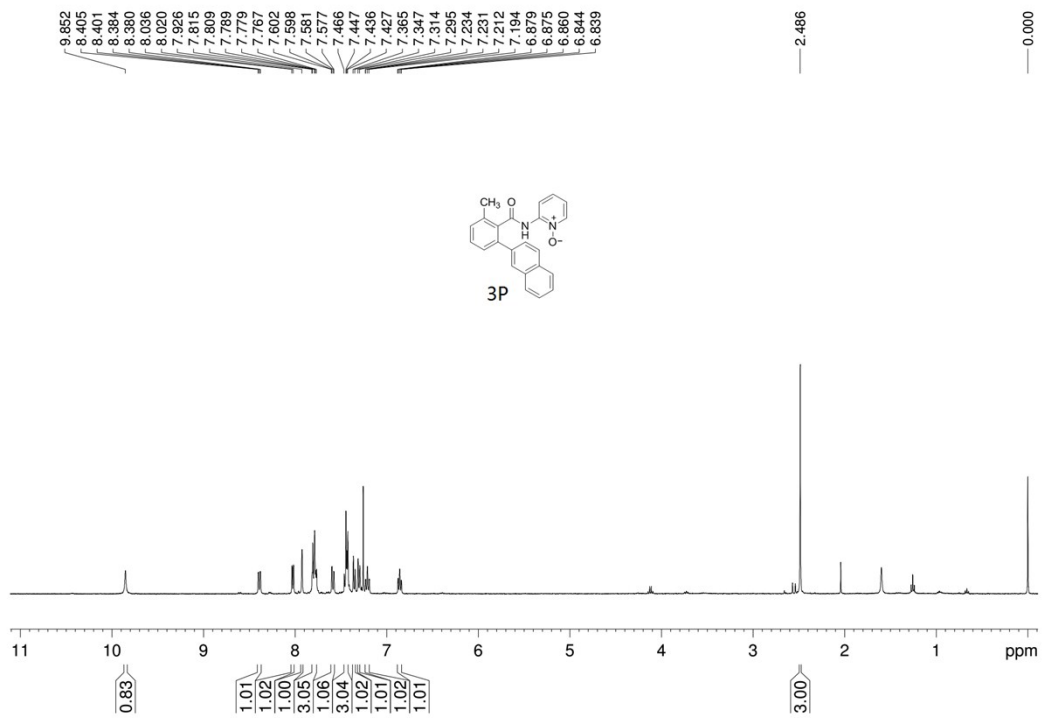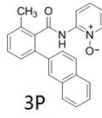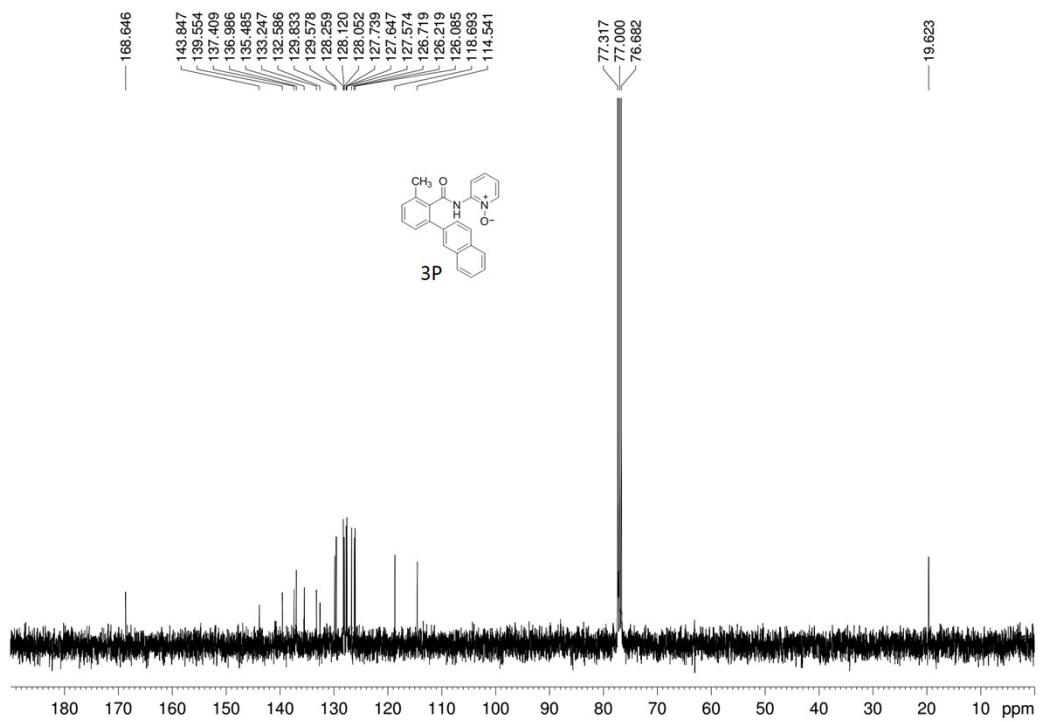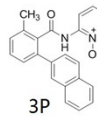

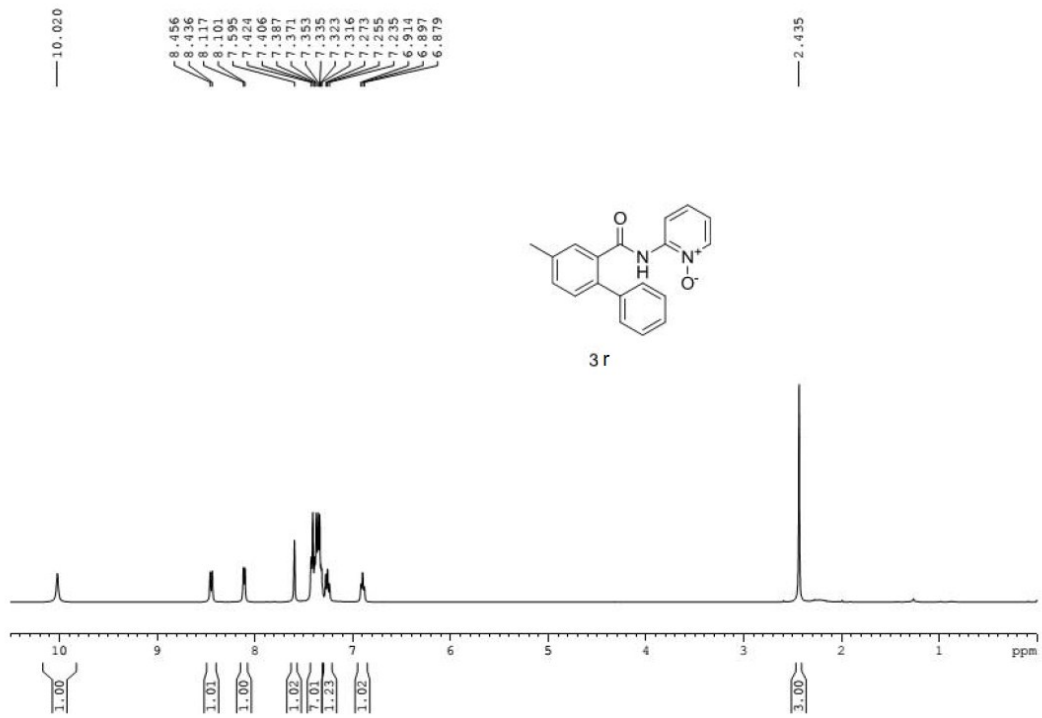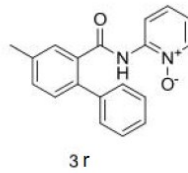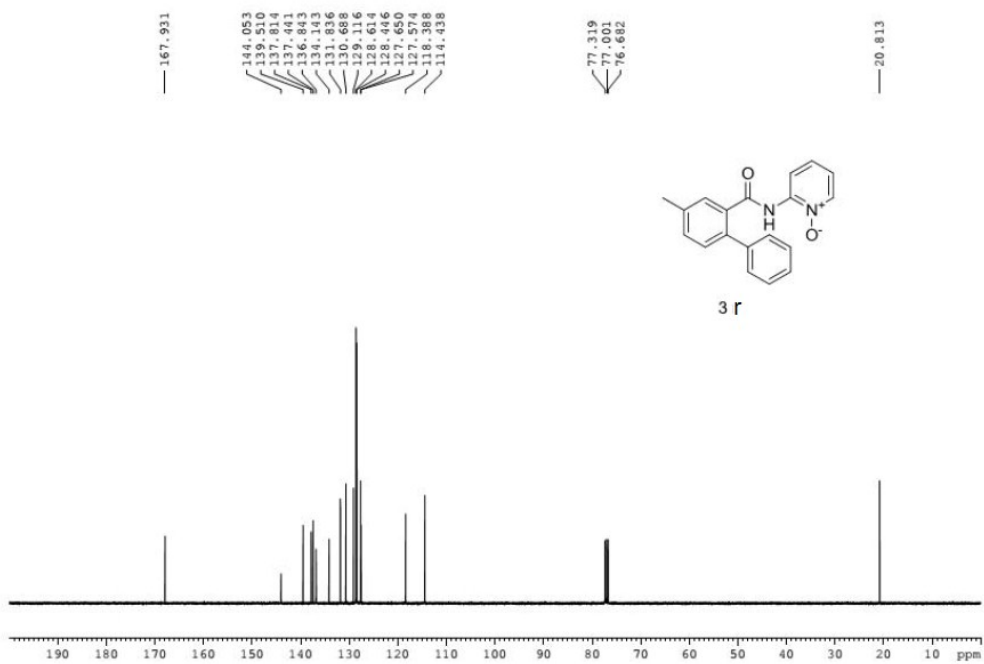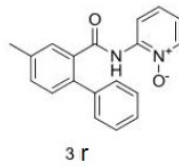

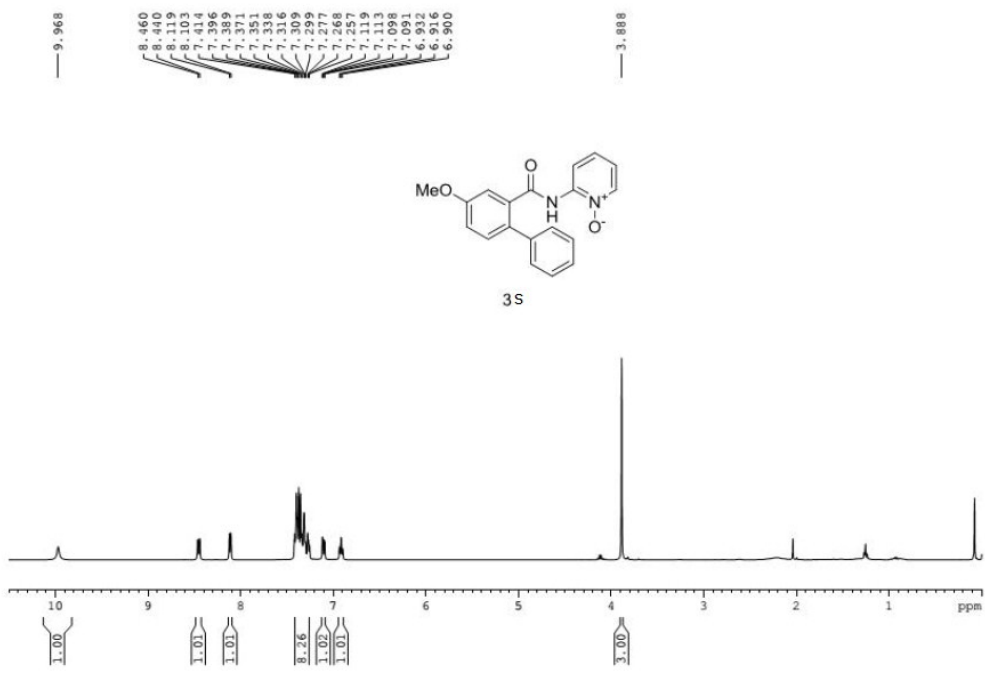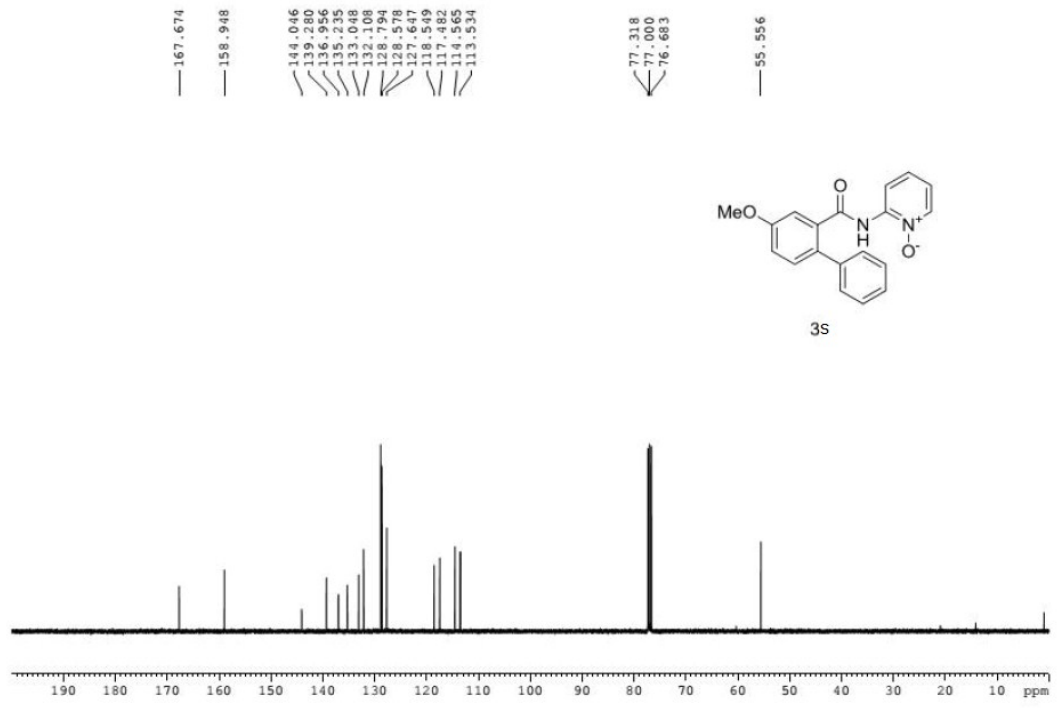

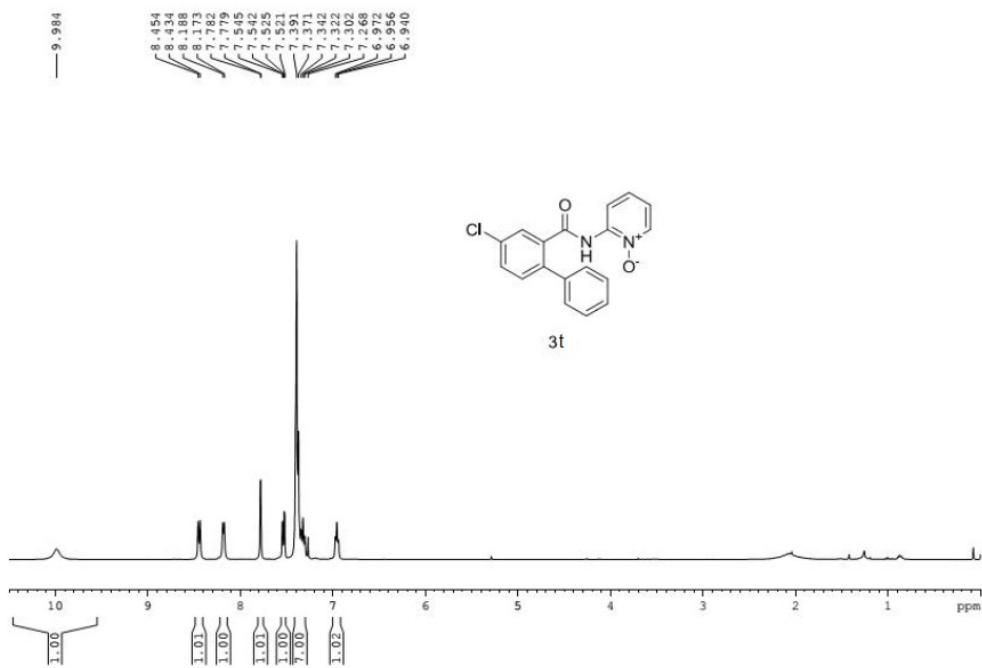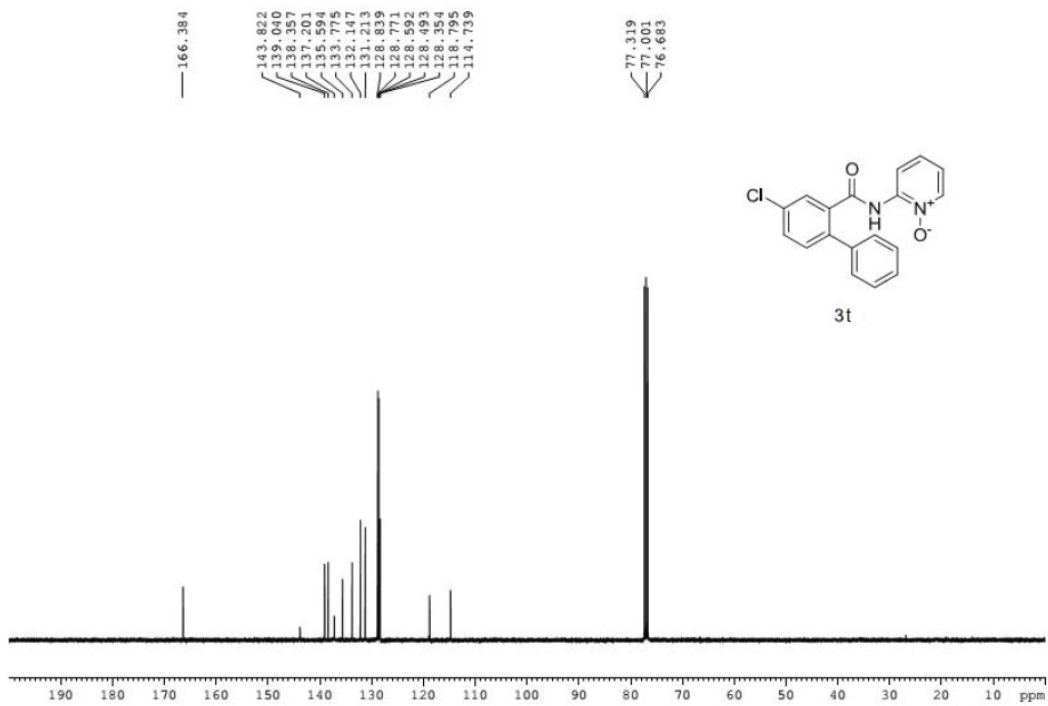

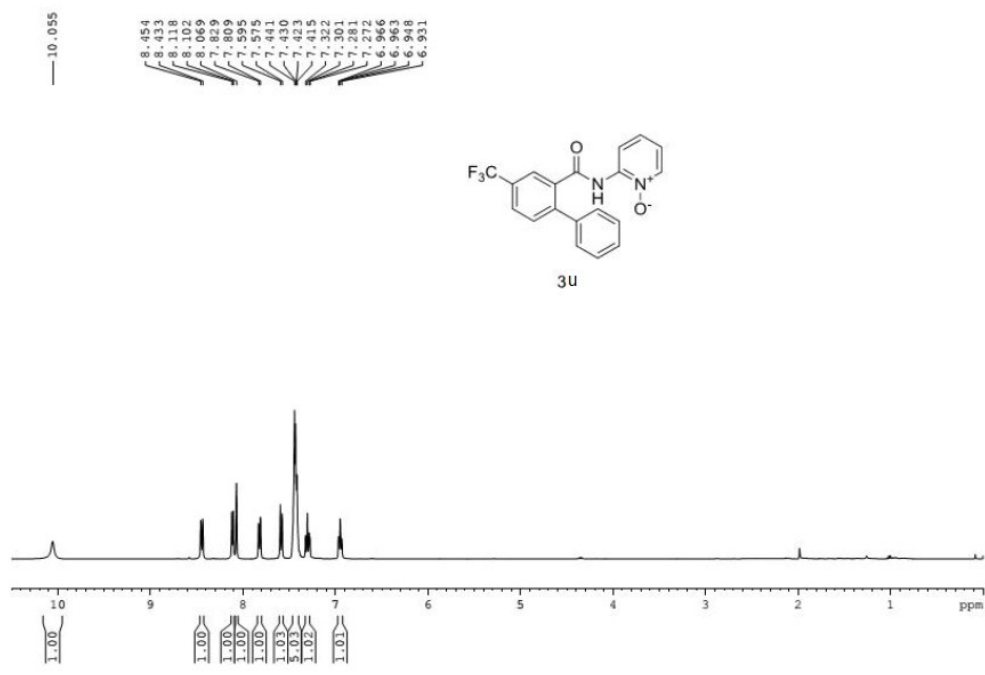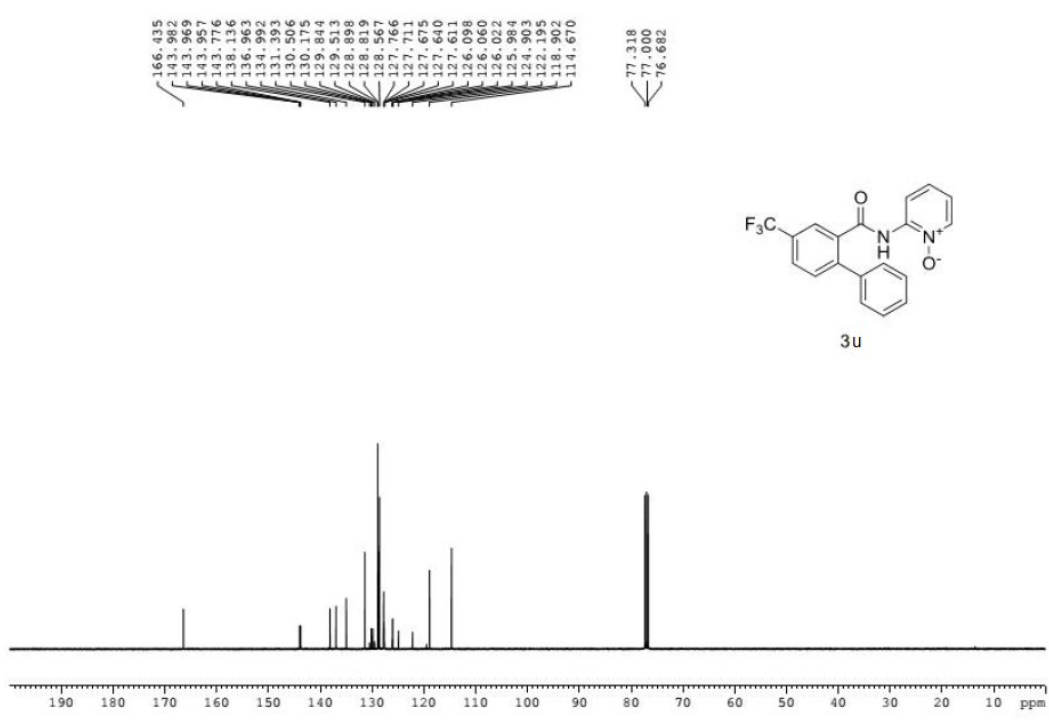

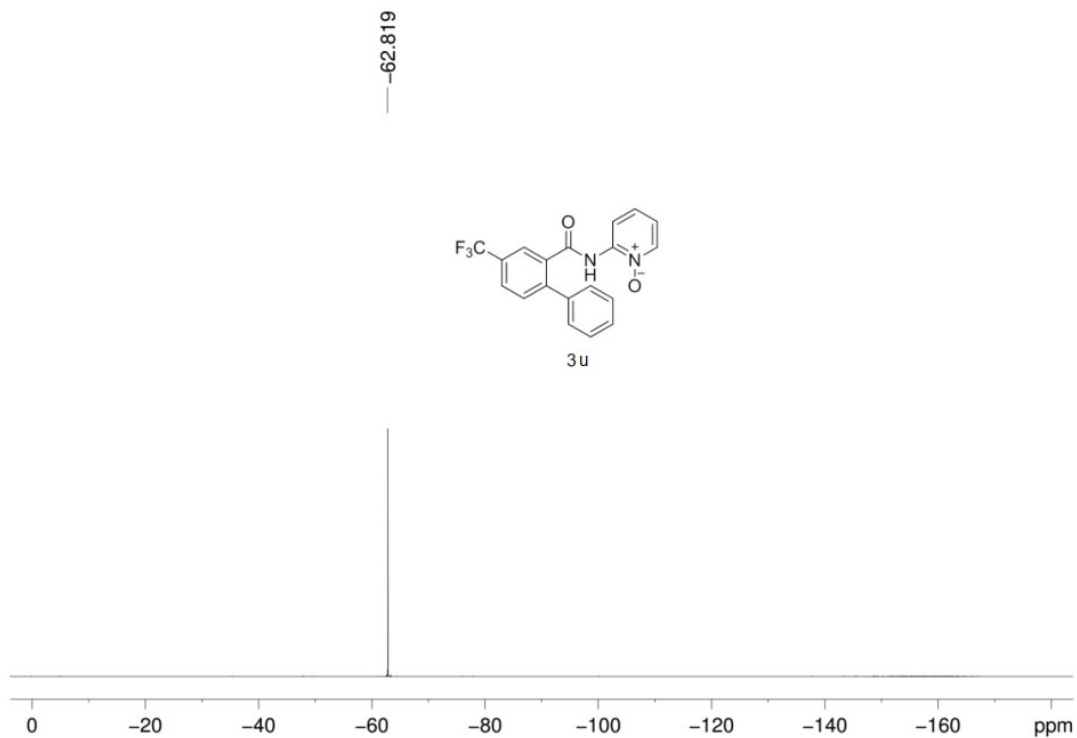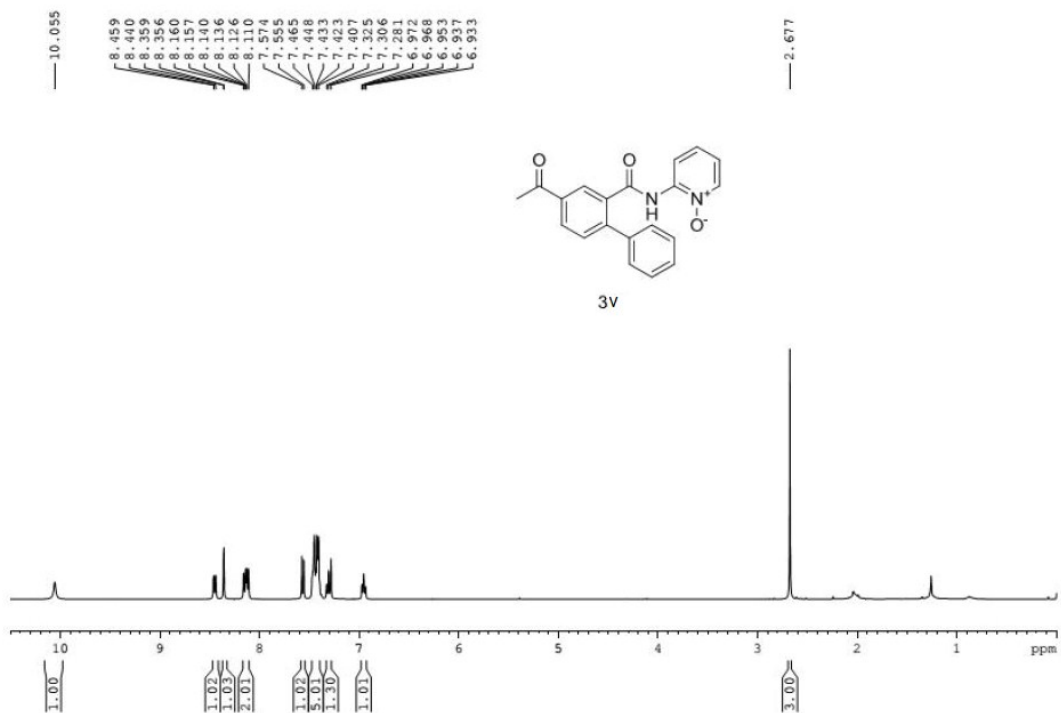

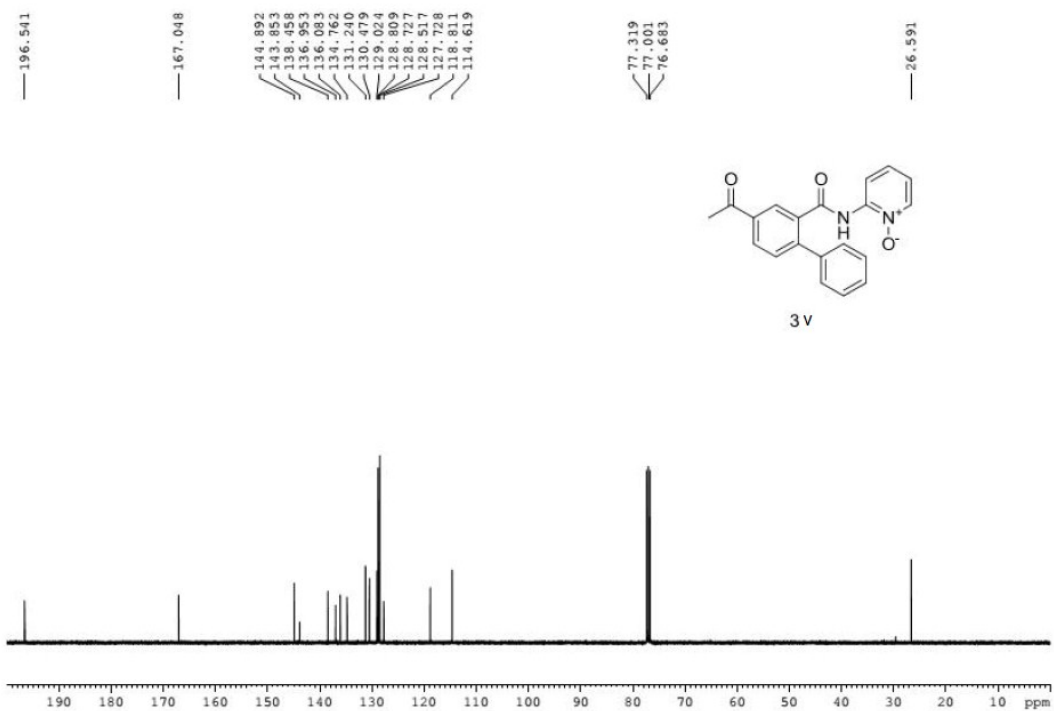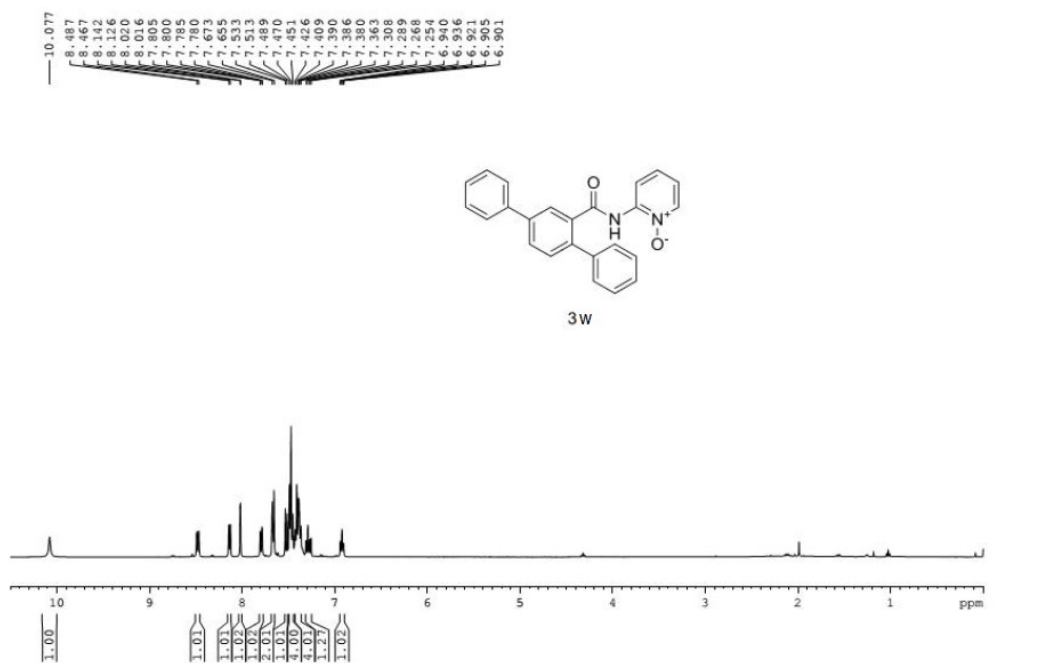



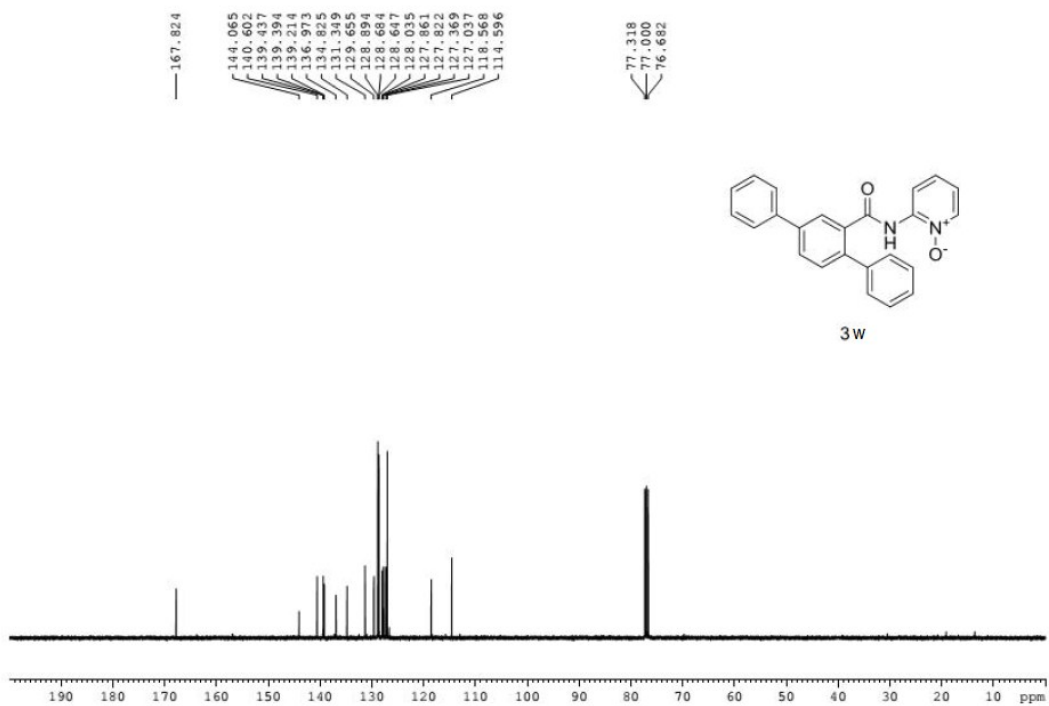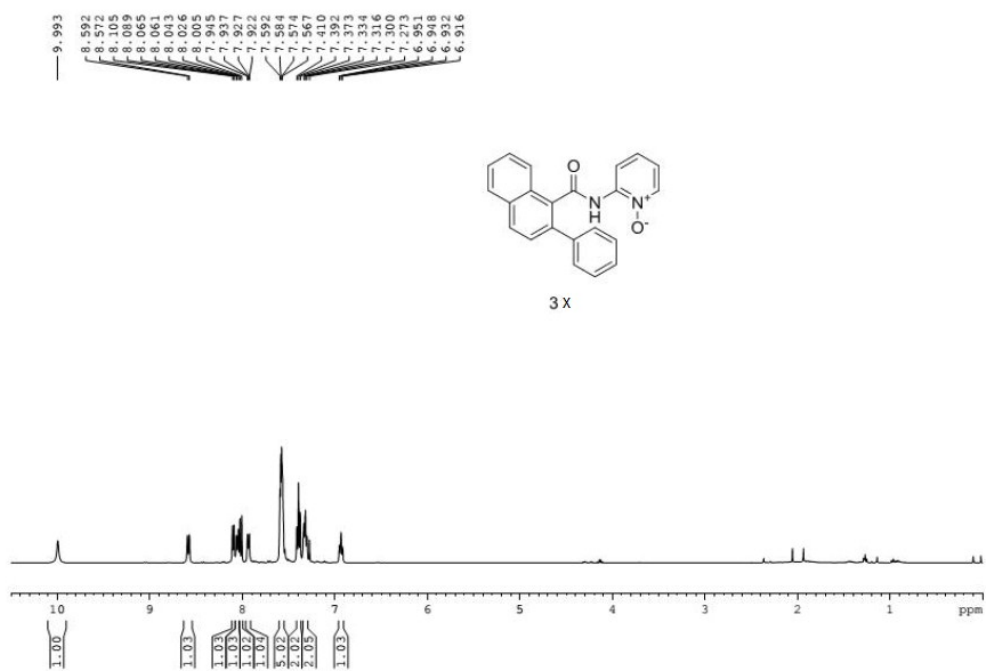

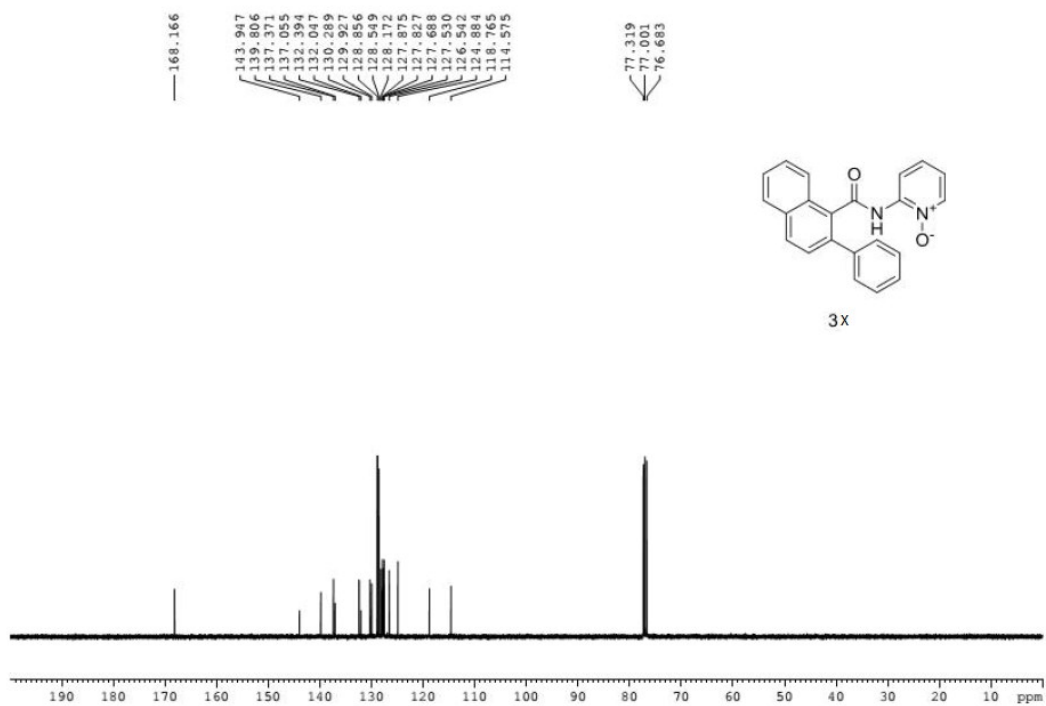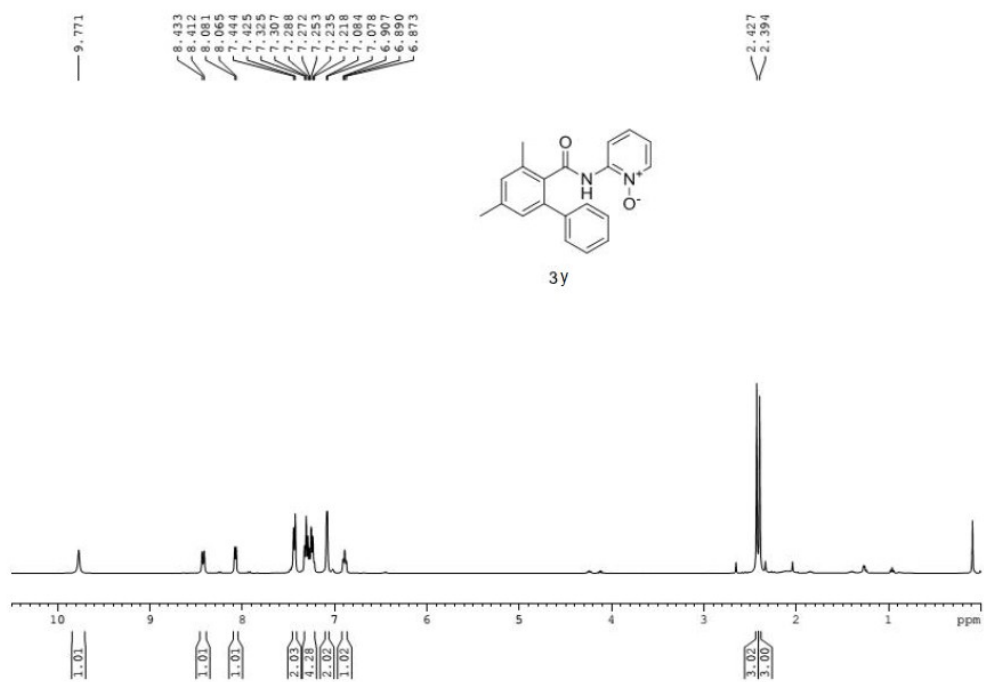

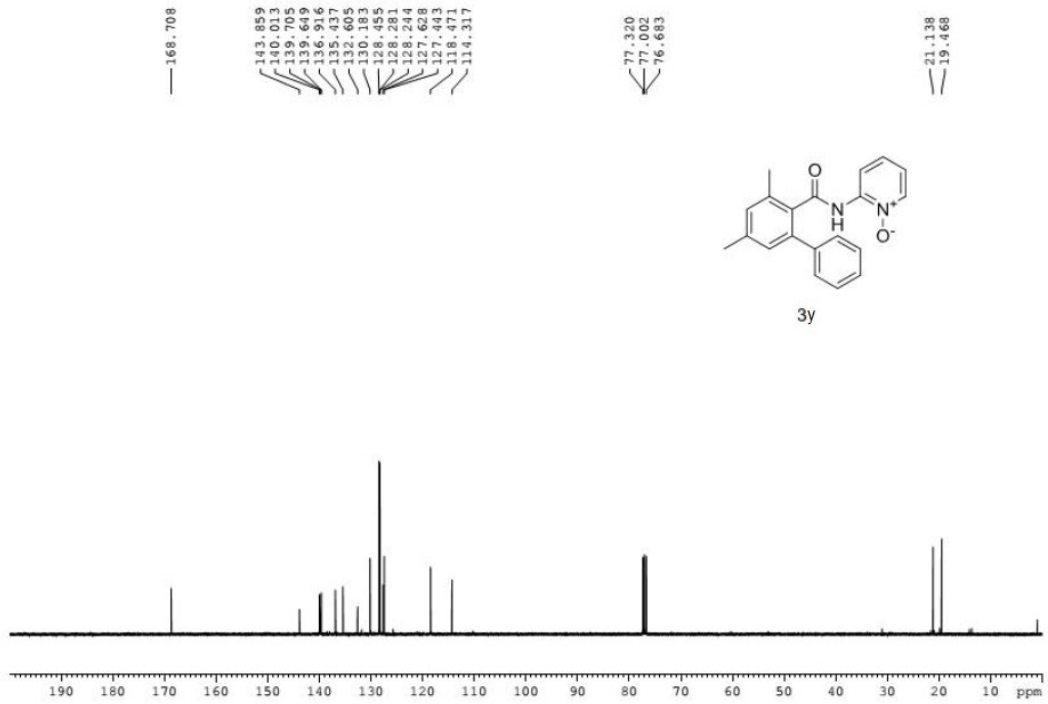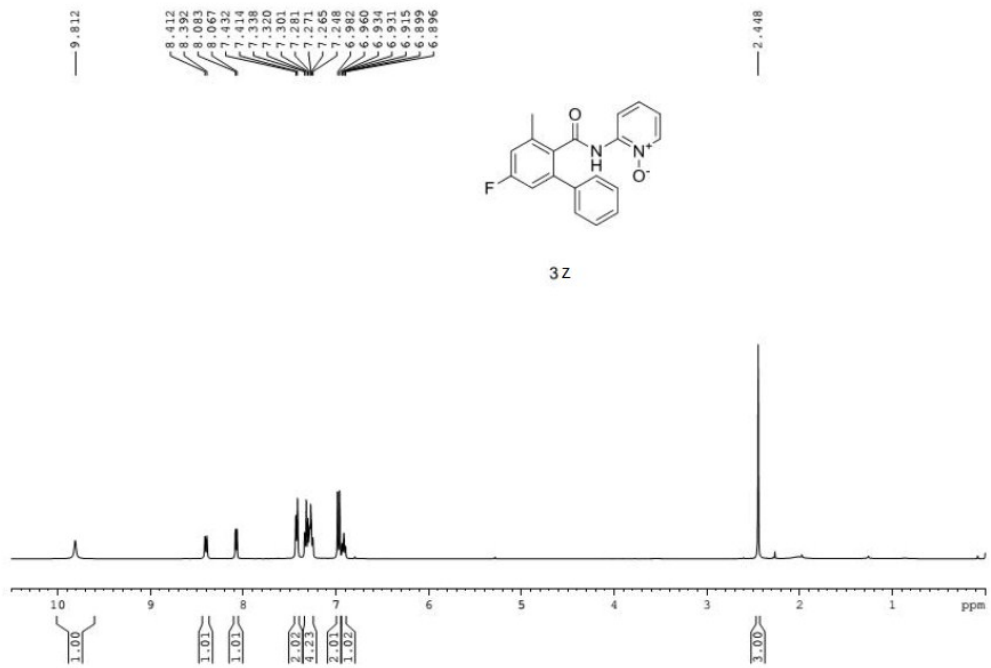

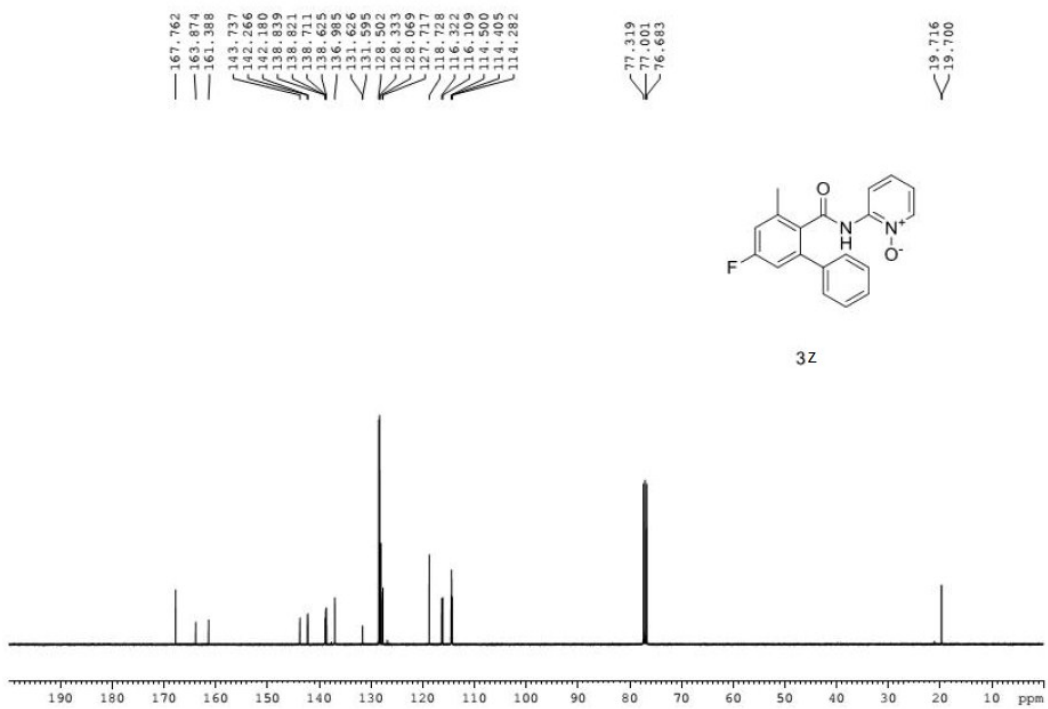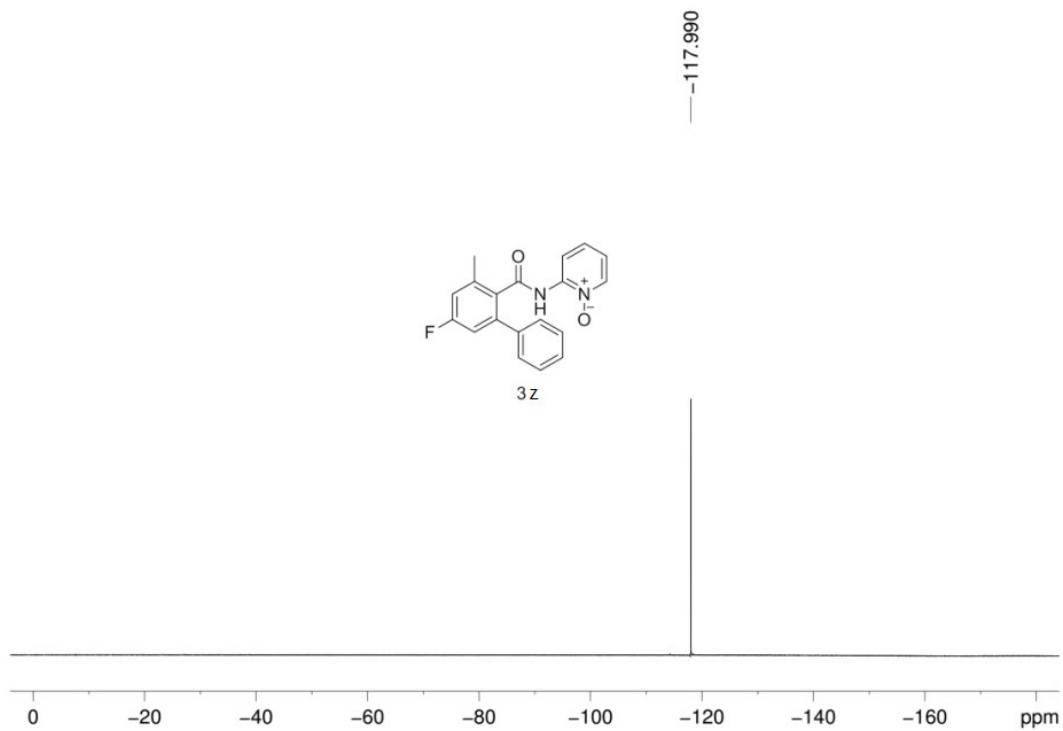

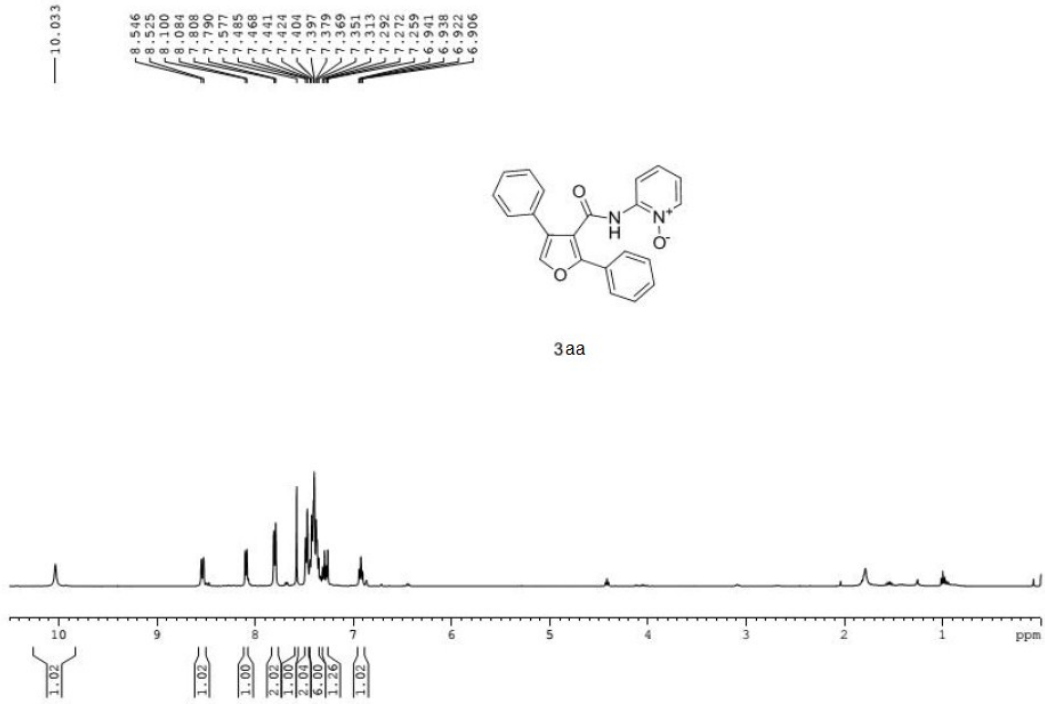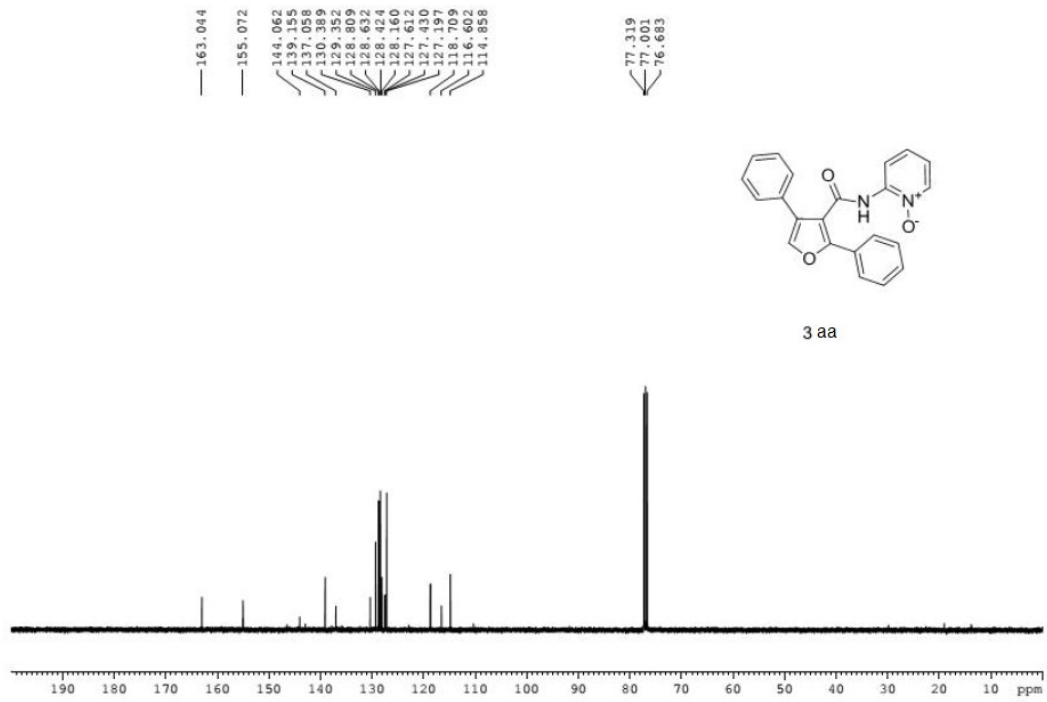

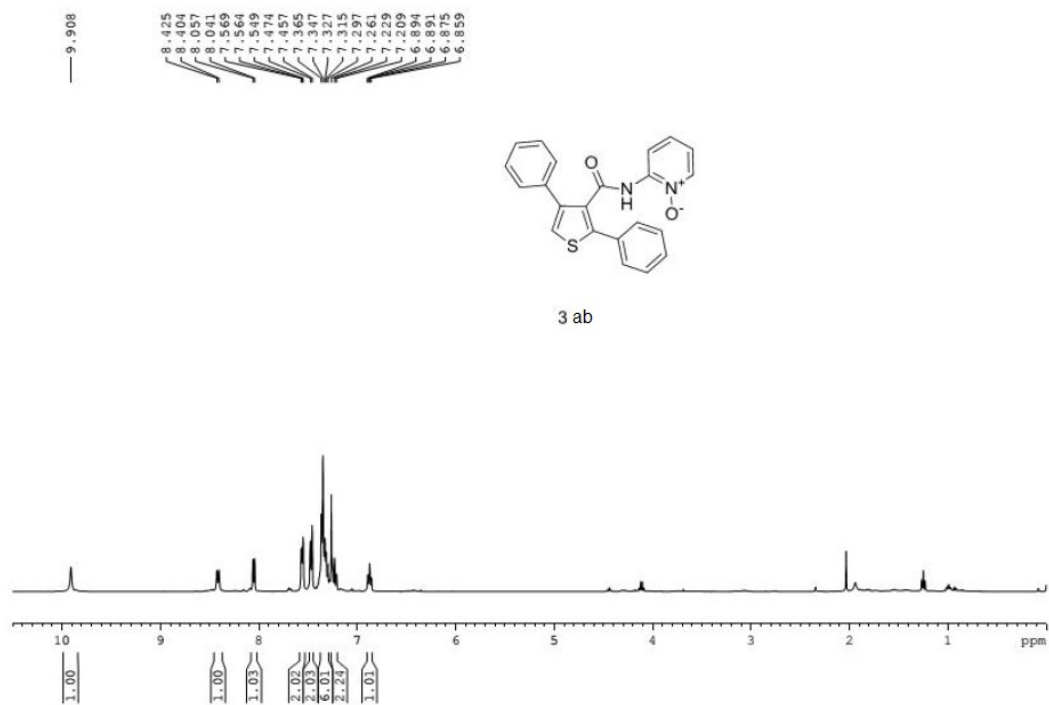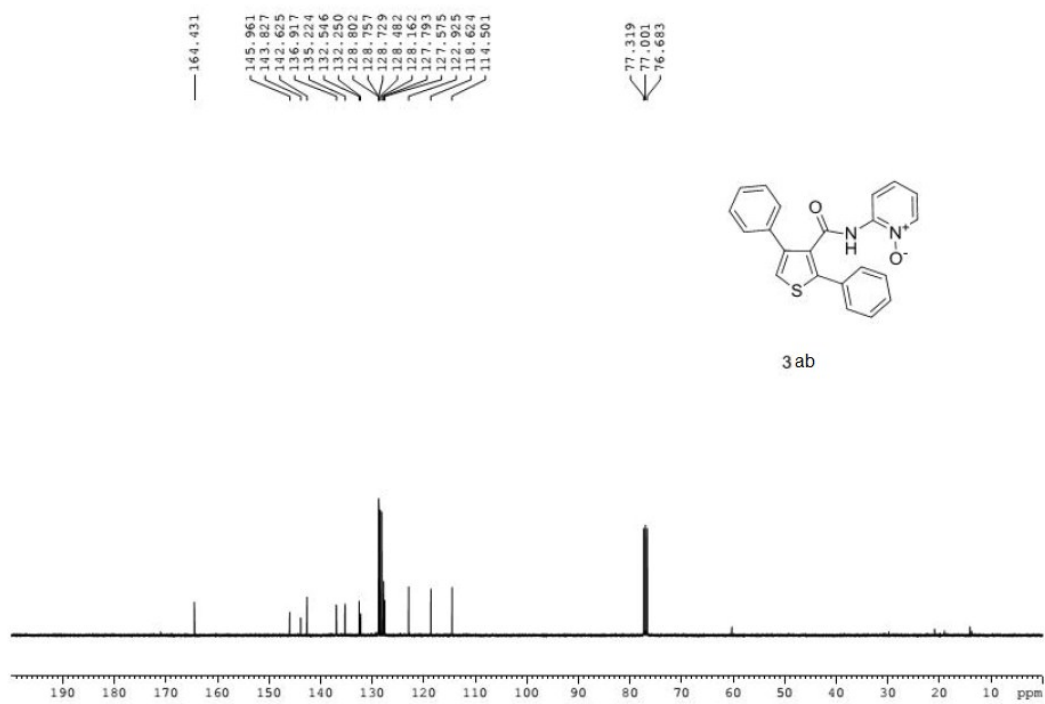

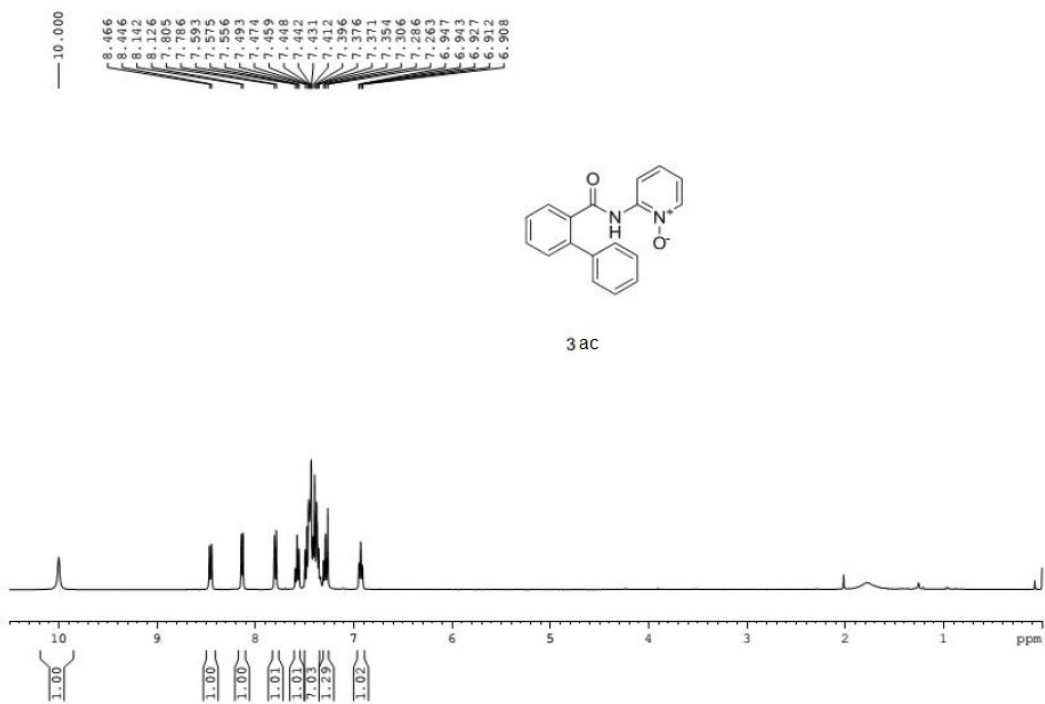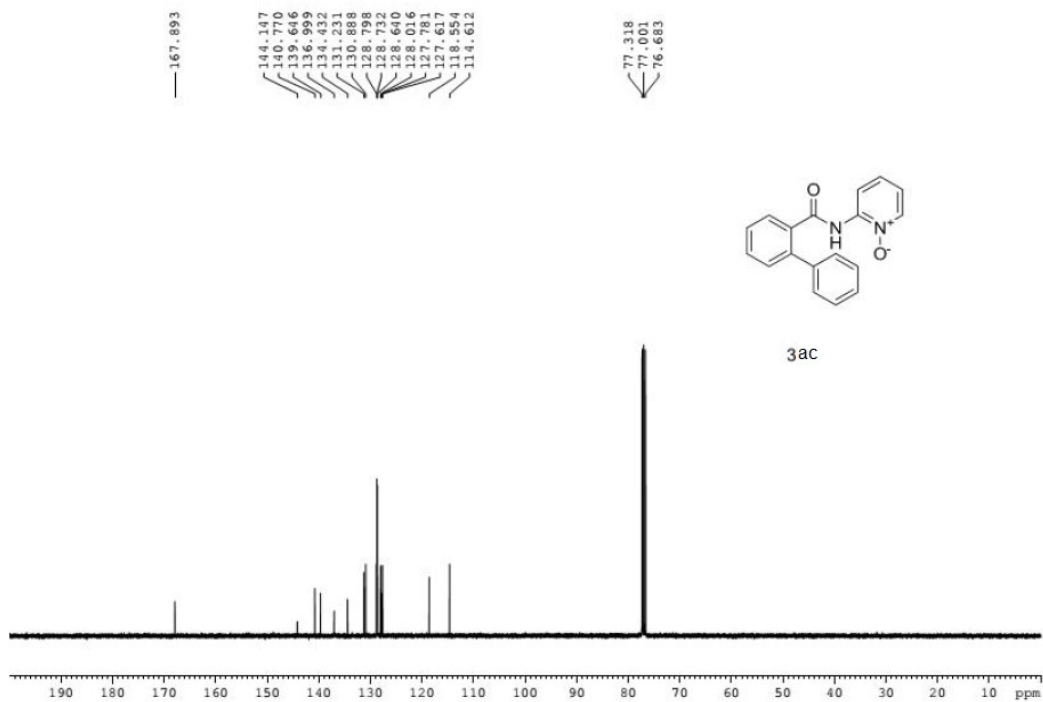

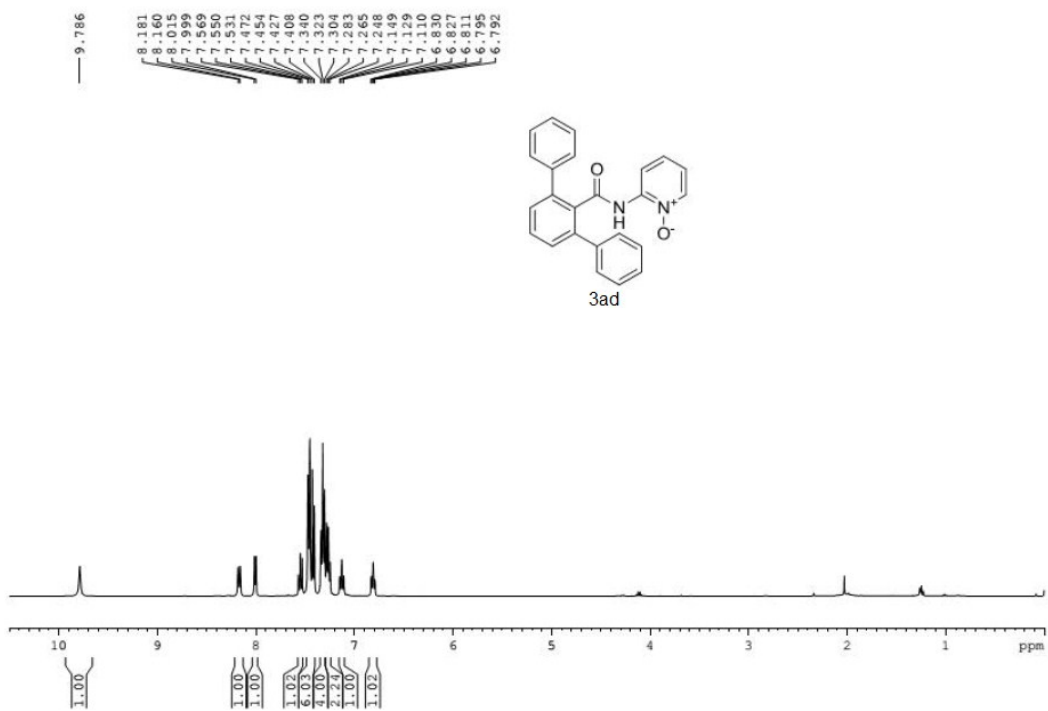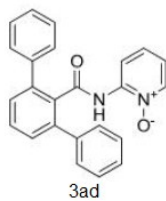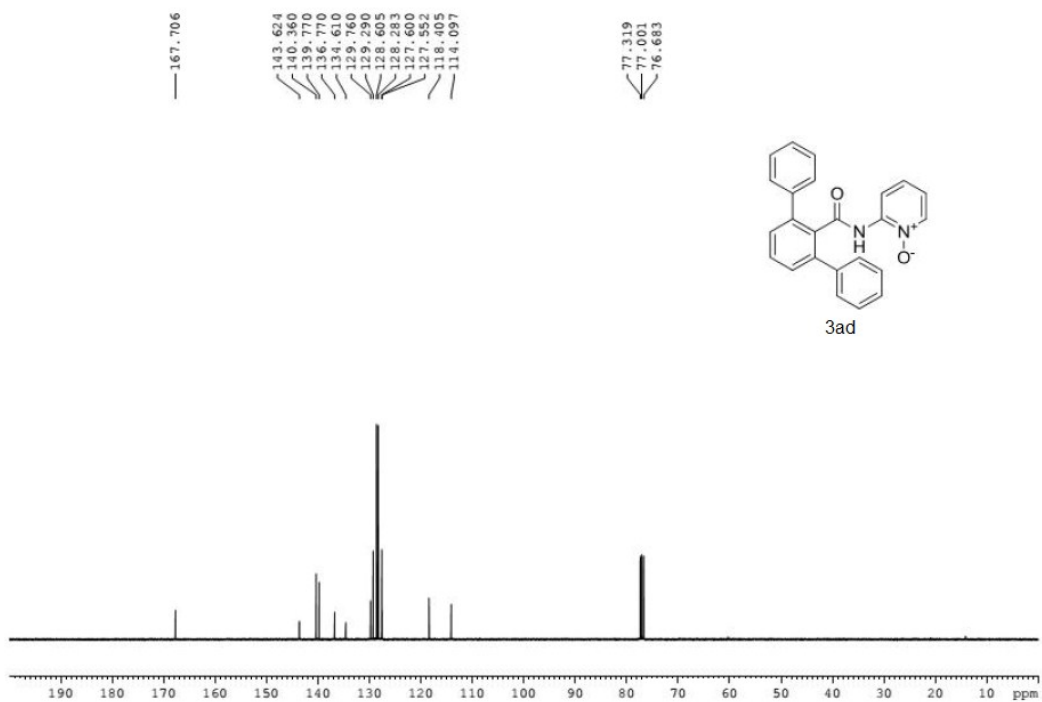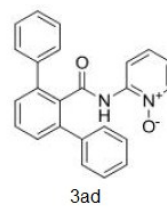

Supplement: c8ob02237b1.pdf [file c8ob02237b1.pdf]
